# Supplementary material for: The P-glycoprotein repertoire of the equine parasitic nematode Parascaris univalens
Source: PubMed Central journal article supplement (PMC7423980; doi:10.1038/s41598-020-70529-6), 2020-08-12
Supplement: 41598_2020_70529_MOESM1_ESM.pdf [file 41598_2020_70529_MOESM1_ESM.pdf]

# The P-glycoprotein repertoire of the equine parasitic nematode *Parascaris univalens*

Alexander P. Gerhard<sup>1</sup>, Jürgen Krücken<sup>1</sup>, Emmanuel Heitlinger<sup>2,3</sup>, I. Jana I. Janssen<sup>1</sup>, Marta Basiaga<sup>4</sup>, Sławomir Kornas<sup>4</sup>, Celine Beier<sup>1</sup>, Martin K. Nielsen<sup>5</sup>, Richard E. Davis<sup>6</sup>, Jianbin Wang<sup>6,7</sup>, Georg von Samson-Himmelstjerna<sup>1\*</sup>

<sup>1</sup>Institute for Parasitology and Tropical Veterinary Medicine, Freie Universität Berlin, Germany

<sup>2</sup>Institute of Biology, Molecular Parasitology, Humboldt-Universität zu Berlin, Berlin, Germany

<sup>3</sup>Leibniz Institute for Zoo and Wildlife Research, Research Group Ecology and Evolution of Parasite Host Interactions, Berlin, Germany

<sup>4</sup>Department of Zoology and Animal Welfare, University of Agriculture in Kraków, Poland

<sup>5</sup>Maxwell H. Gluck Equine Research Center, University of Kentucky, Lexington, USA

<sup>6</sup>Department of Biochemistry and Molecular Genetics, RNA Bioscience Initiative, University of Colorado School of Medicine, Aurora, USA

<sup>7</sup>Department of Biochemistry and Cellular and Molecular Biology, University of Tennessee, Knoxville, TN, USA

\*Corresponding Author

[samson.georg@fu-berlin.de](mailto:samson.georg@fu-berlin.de)

## Supplementary Material

Supplementary Figure S1 Comparison of annotation of *Parascaris univalens* P-glycoproteins

Supplementary Figure S2 Tissue expression levels

Supplementary Figure S3 RT-PCR *PunPgp-2* and *PunPgp-9*

Supplementary Table S1 Contig Coverage

Supplementary Table S2 Primers and sequences

Supplementary Table S3 Accession numbers

# (A) PgR011

cDNA annotation

WormBase ParaSite annotation  
version WBPS14

new cDNA exons

exons common to both annotations

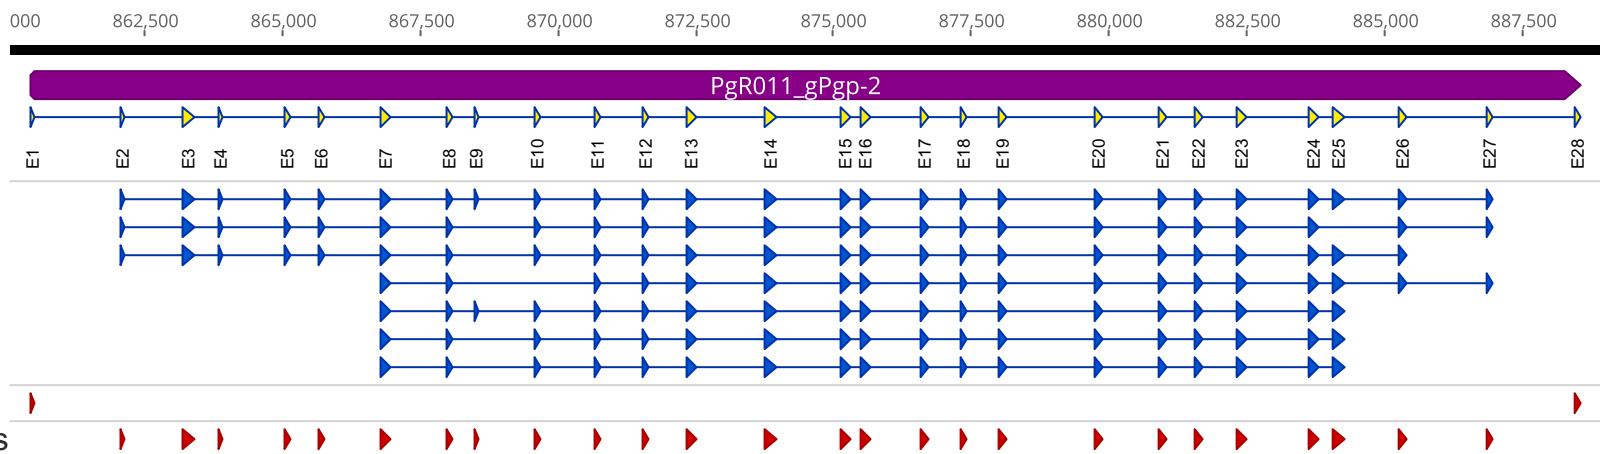

transcriptome  
sample (tissue)

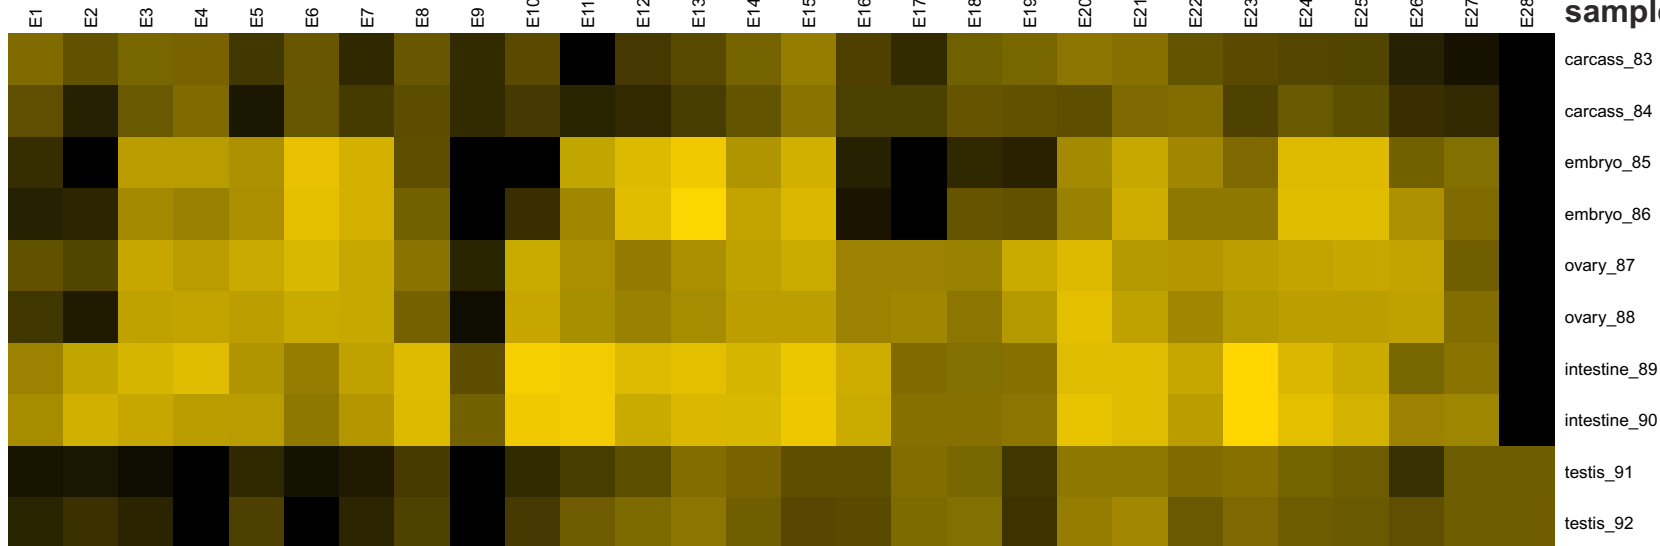

0.0 5.1 FPKM



# (C) PGR025

cdDNA annotation

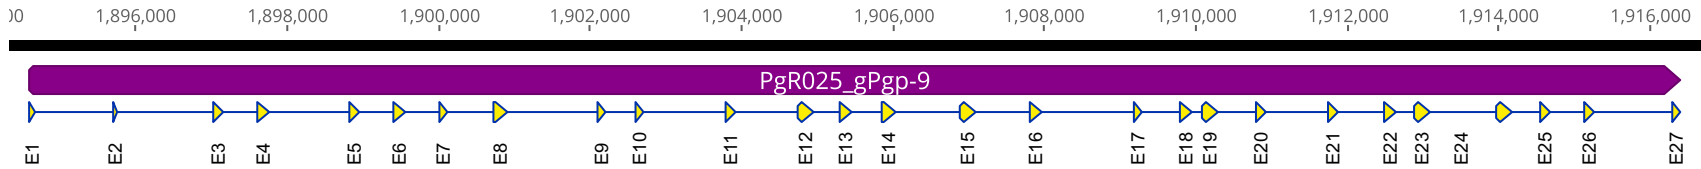

WormBase ParaSite annotation  
version WBPS14

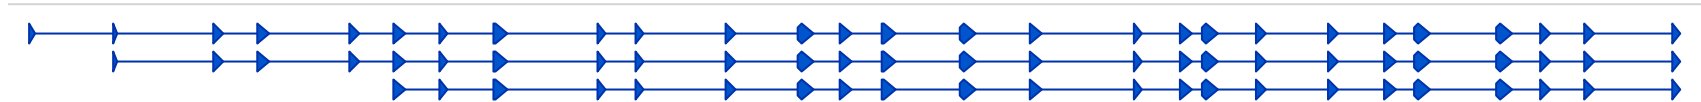

new cDNA exons

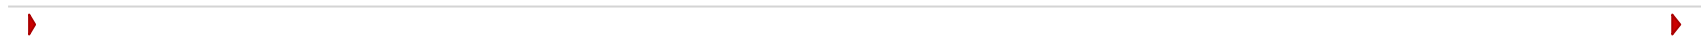

exons common to both annotations

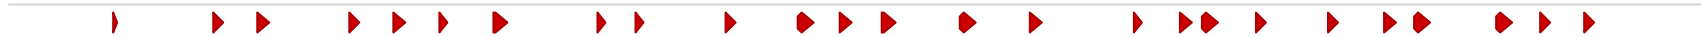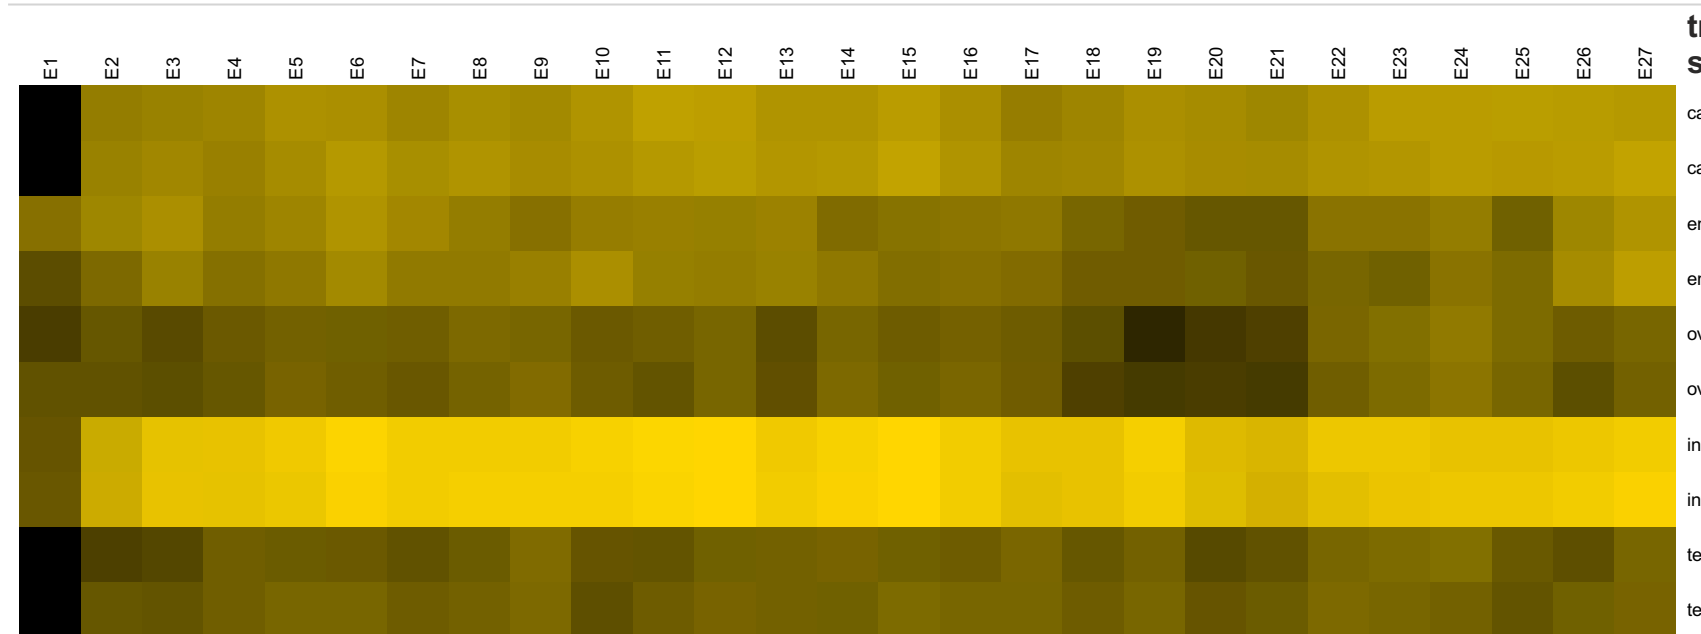

transcriptome  
sample (tissue)

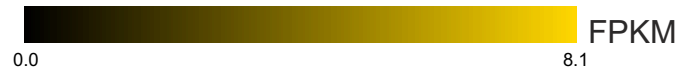

# (D) PgR090

cDNA annotation

WormBase ParaSite annotation  
version WBPS14

new cDNA exons

exons common to both annotations

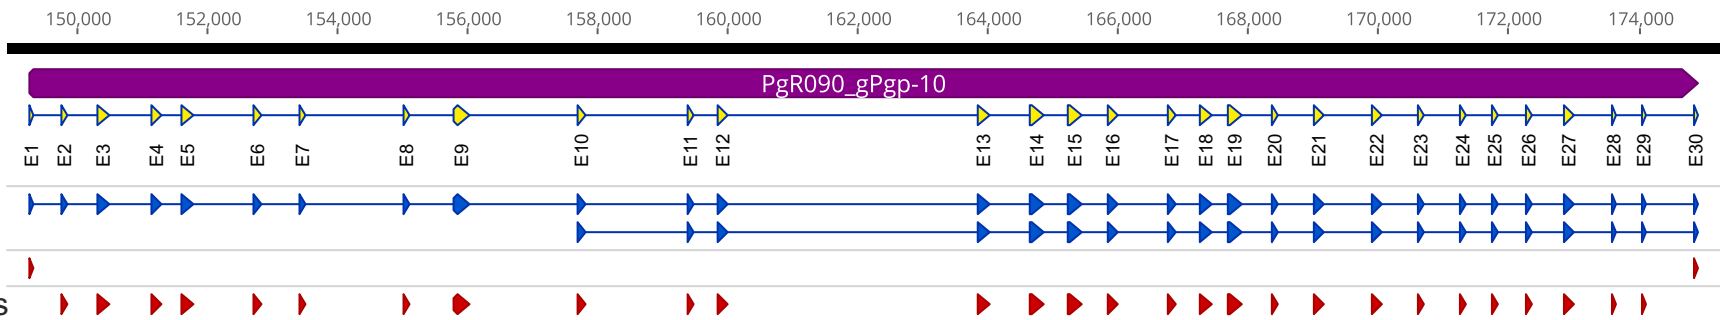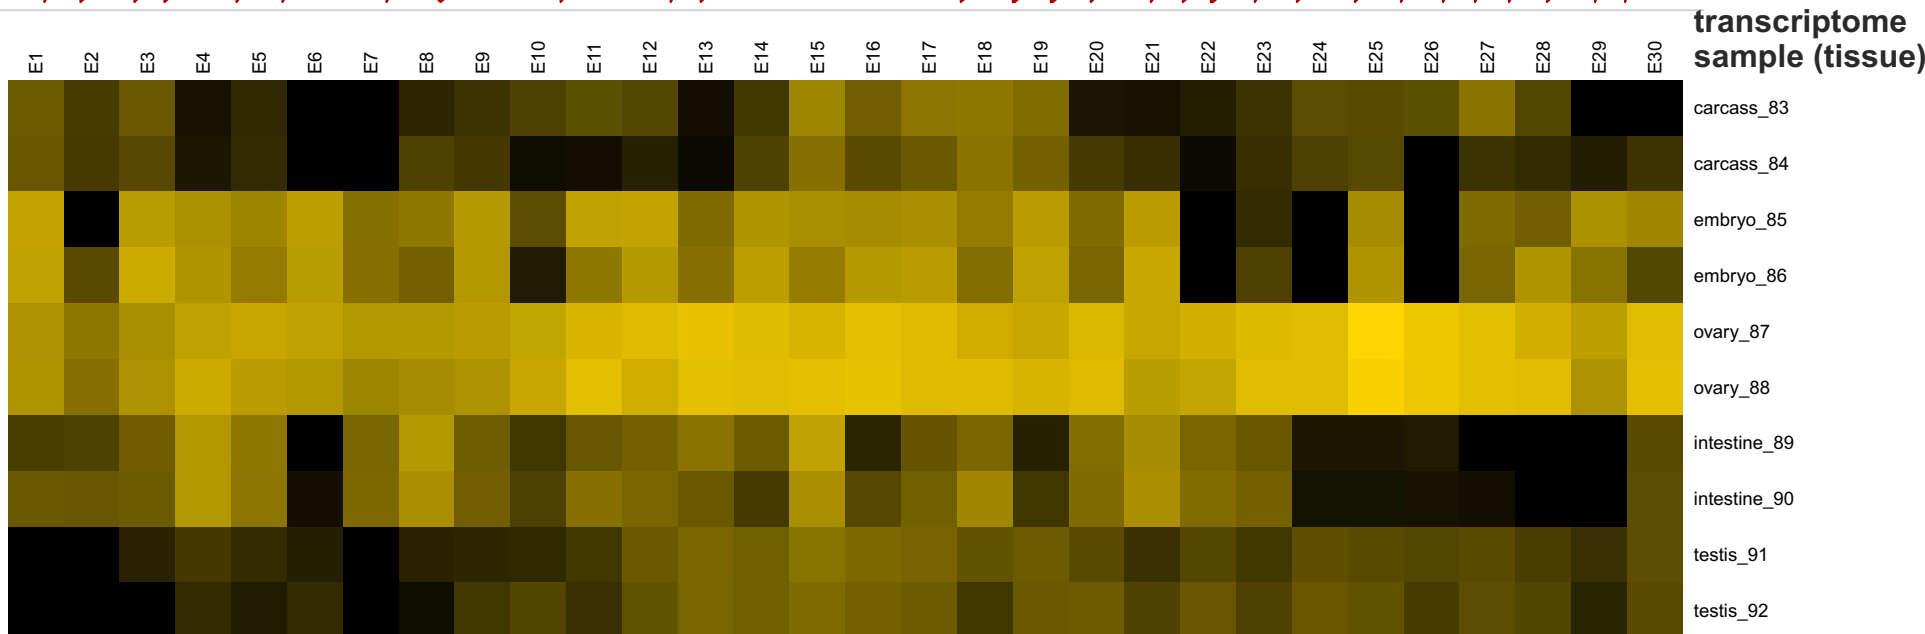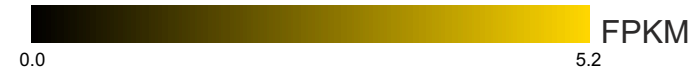

# (E) PGR011

cDNA annotation

WormBase ParaSite annotation  
version WBPS14

new cDNA exons

exons common to both annotations

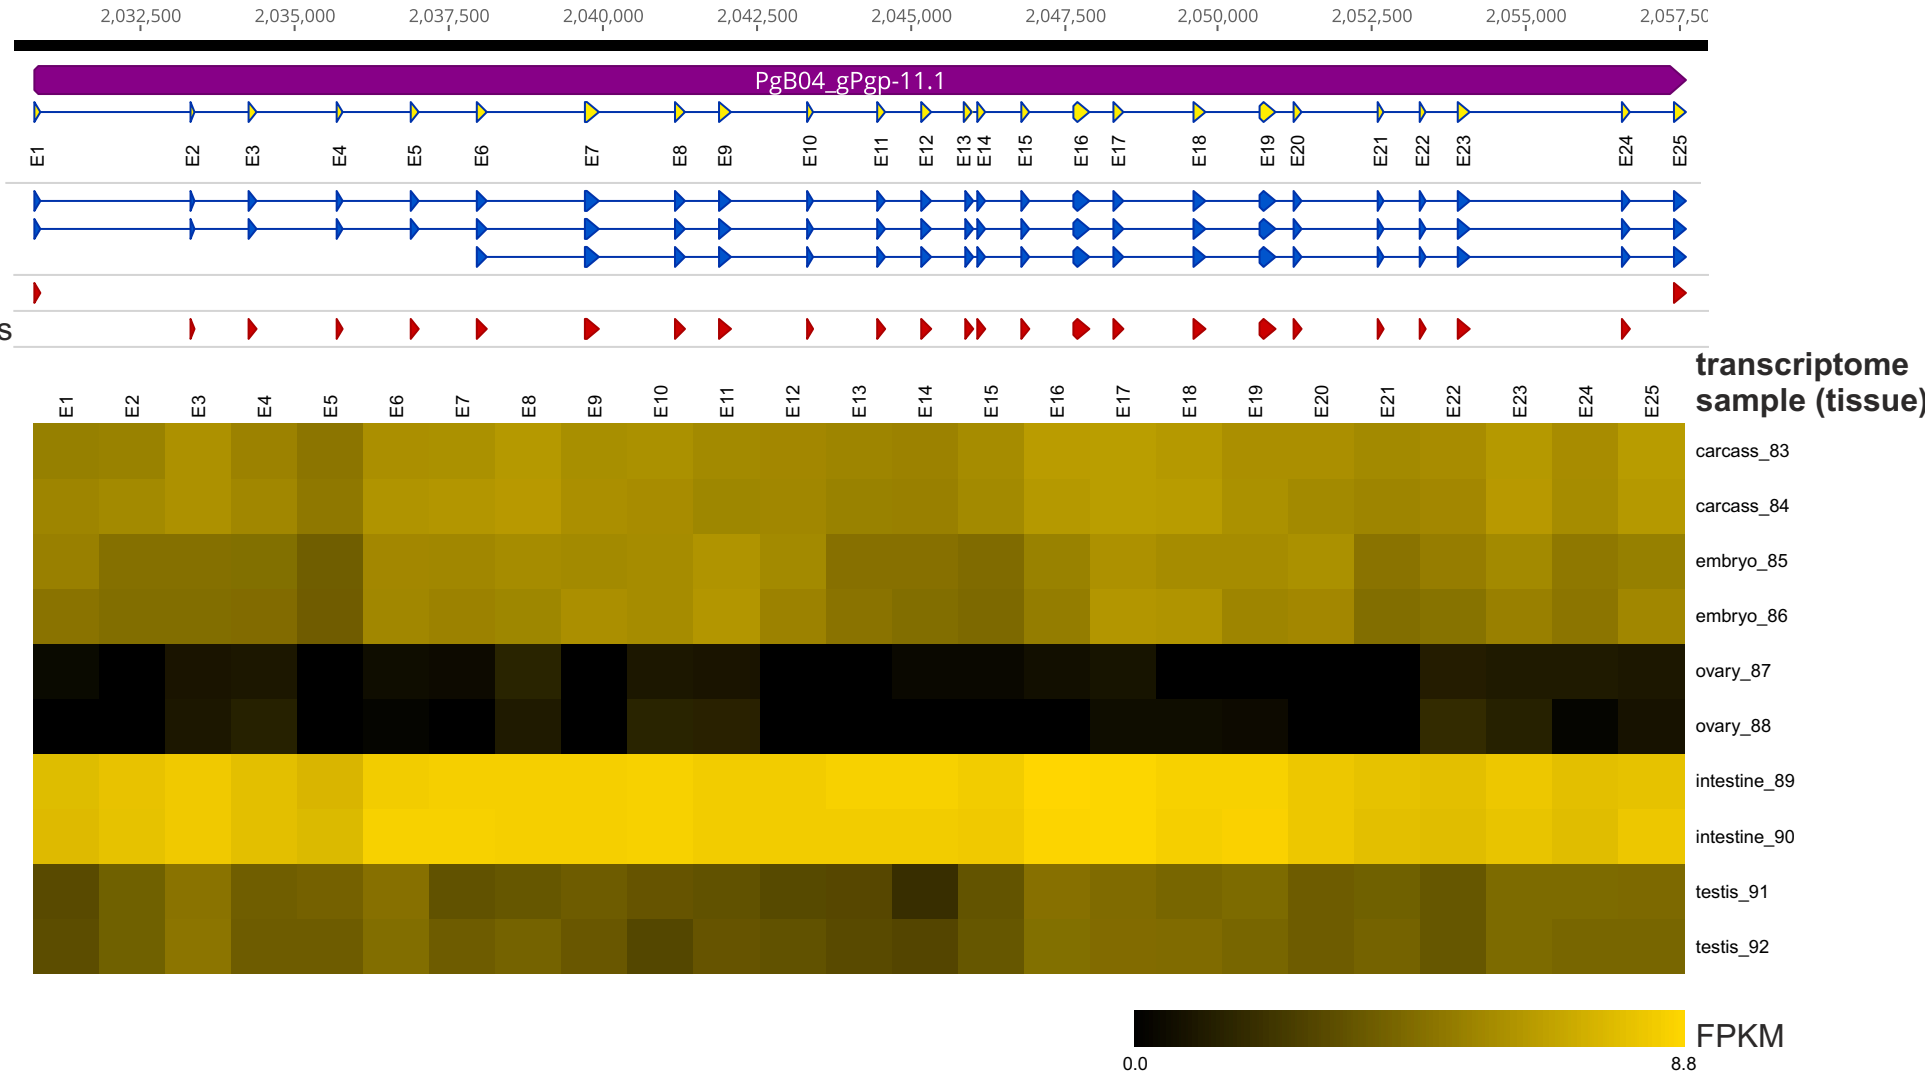

# (F) PGR011

cDNA annotation

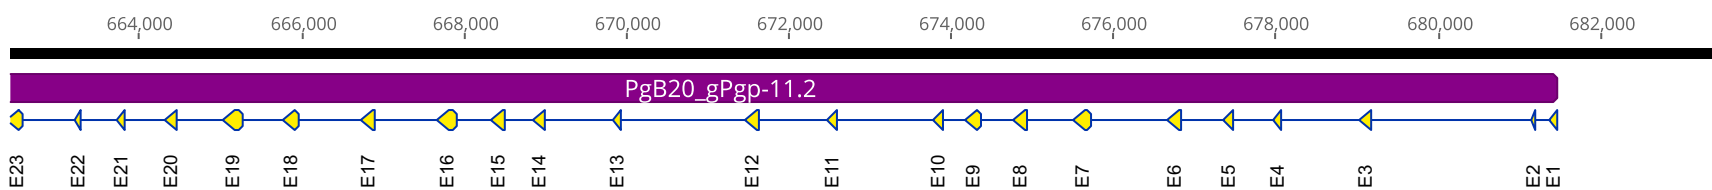

WormBase ParaSite annotation  
version WBPS14

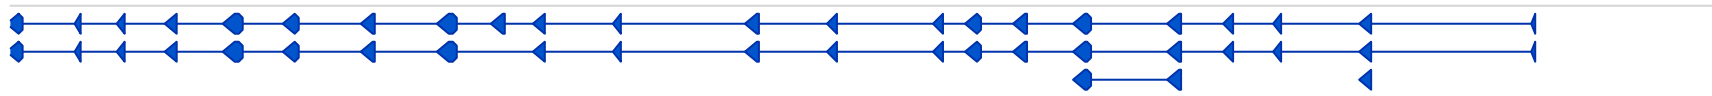

new cDNA exons

exons common to both annotations

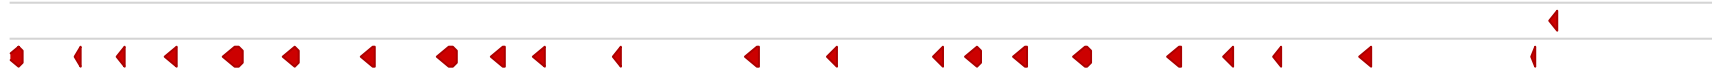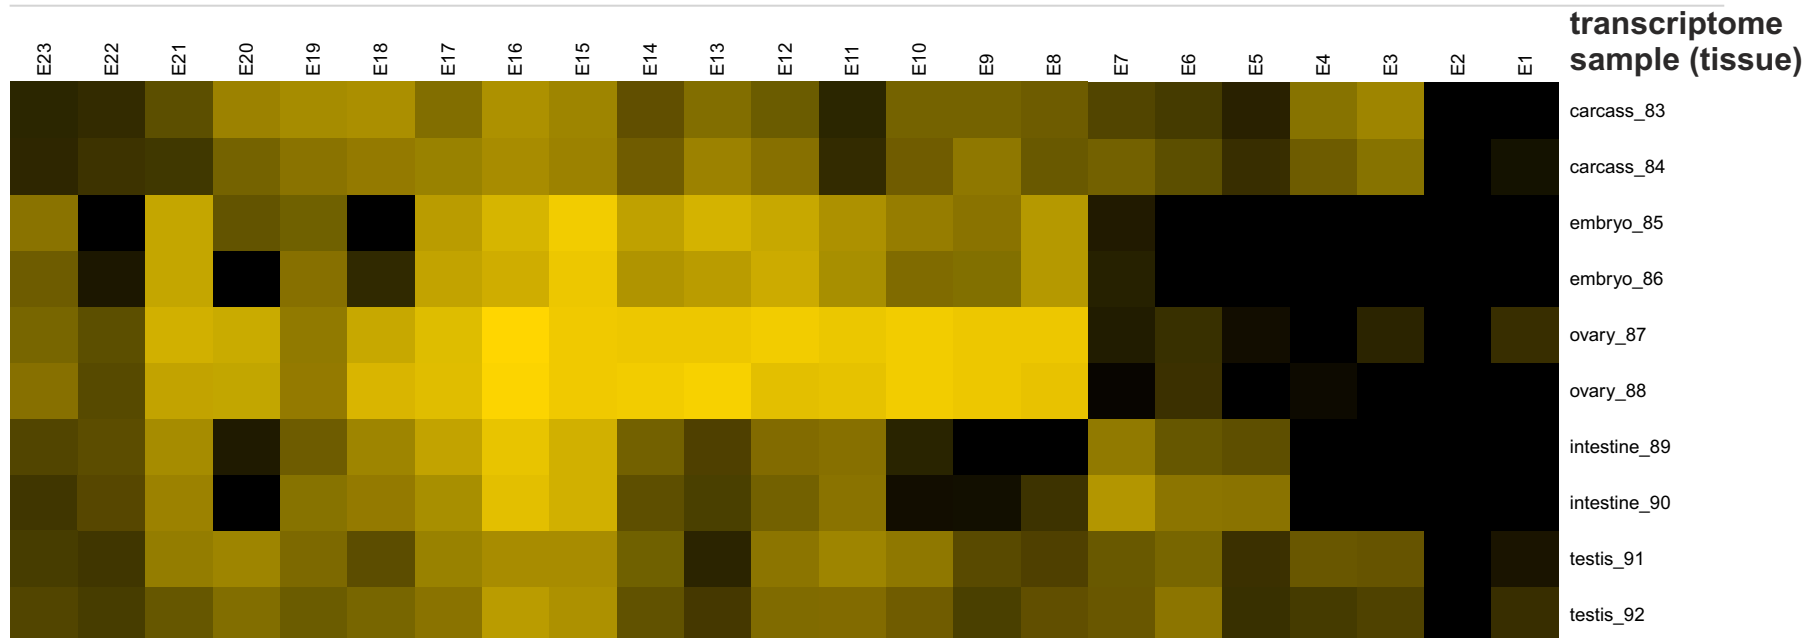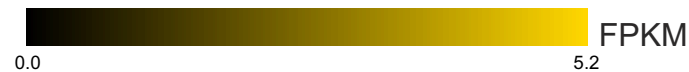





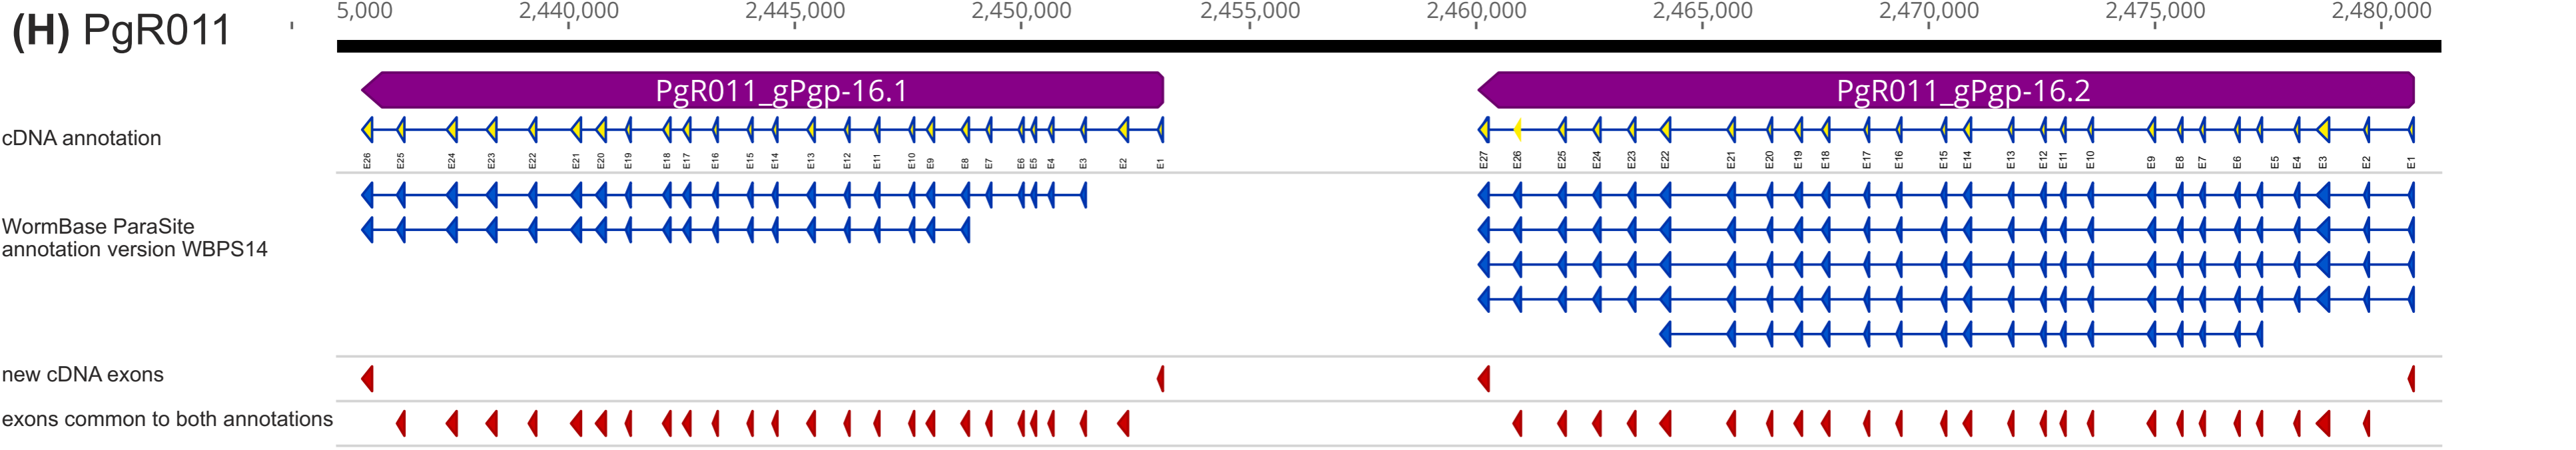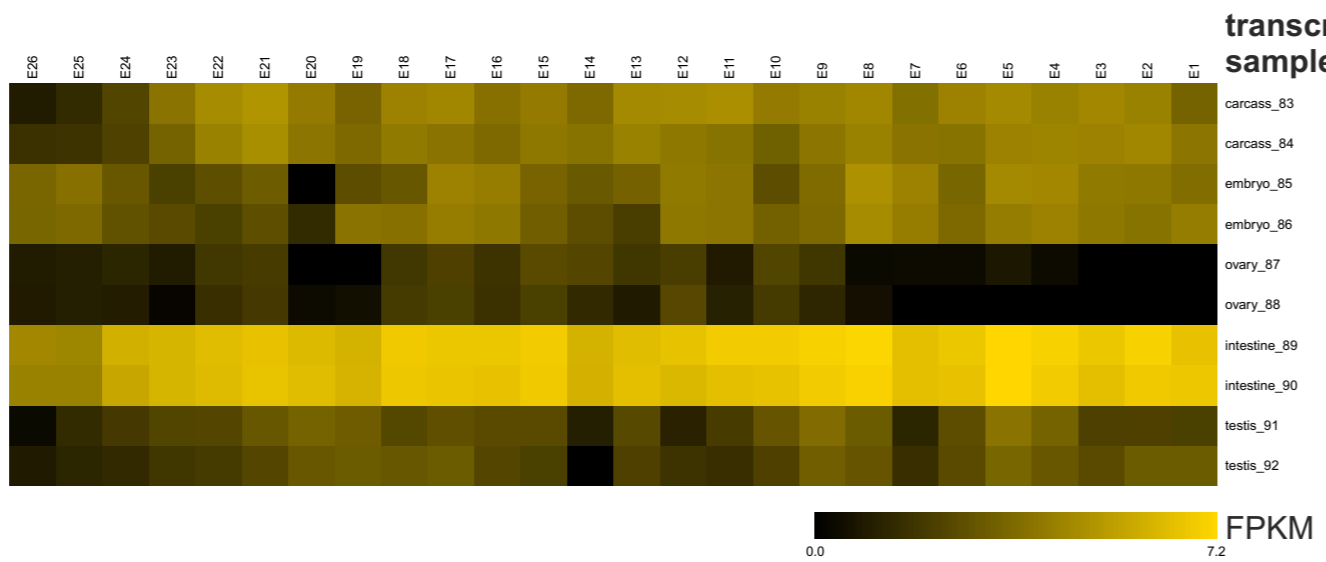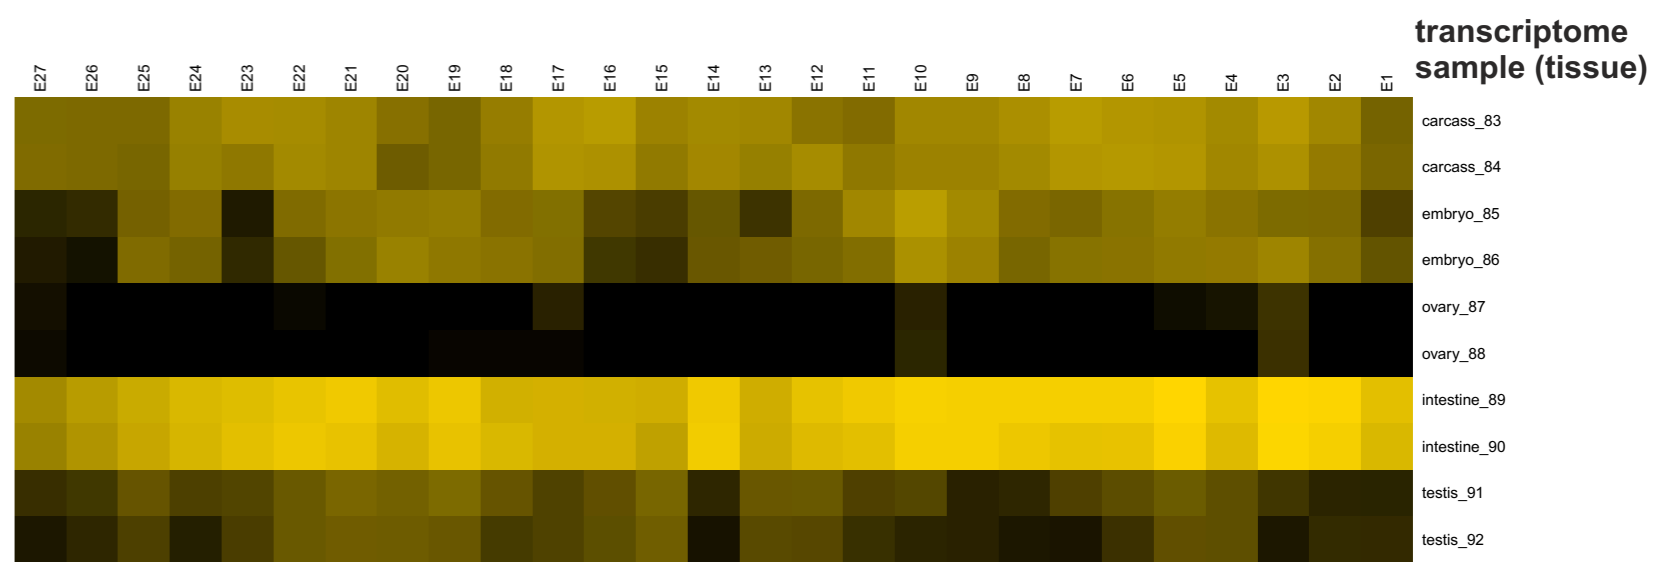



### **Supplemental Figure S1 Annotation of *Parascaris univalens* Pgp**

Improved annotation of experimentally verified *Parascaris univalens* Pgp exons (yellow) numbered 5' to 3' end were compared to original automatic annotation (WormBase ParaSite annotation version WBPS14, blue) and differences of new exons and exons common to both annotation highlighted (red). cDNA sequences of *Parascaris* Pgps were mapped onto the *P. univalens* genome with Splign version 2.1.0 to identify genomic coordinates of exons. Visualisation of original annotation and the newly generated annotation was made using Geneious Prime 2019.2.3. Coverage of individual exons of the new experimental cDNA exons was calculated with R package SGSeq and visualized as a heatmap (FPKM, yellow) for each tissue sample of the tissue specific transcriptome (GeoDataset accession: GSE99524). For each Pgp (A) Pgp-2, (B) Pgp-3, (C) Pgp-9, (D) Pgp-10, (E) Pgp-11.1, (F) Pgp-11.2, (G) Pgp-12, (H) Pgp-16.1 and Pgp-16.2, (I) Pgp-18 were visualized on the respective genomic locus of the respective genomic scaffold (genome assembly ASM225920v1, version WBPS14). Pgp: P-glycoprotein

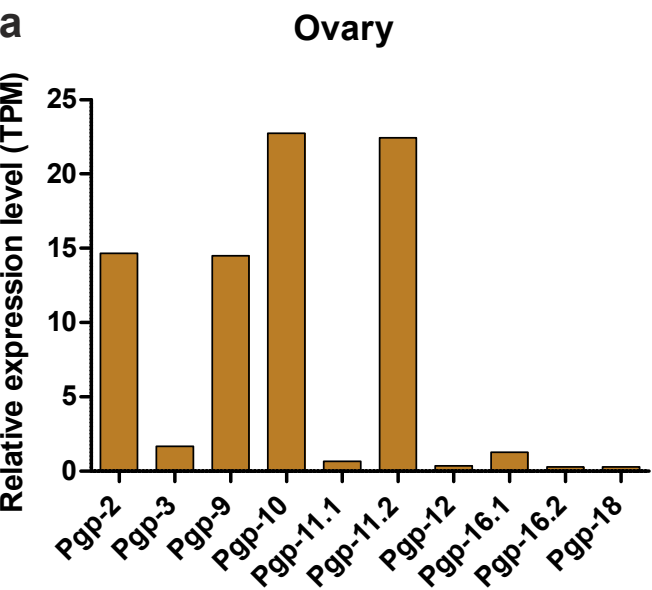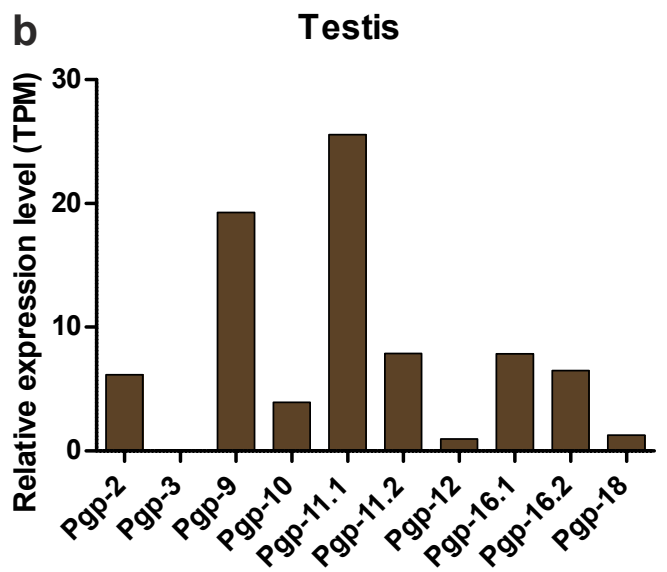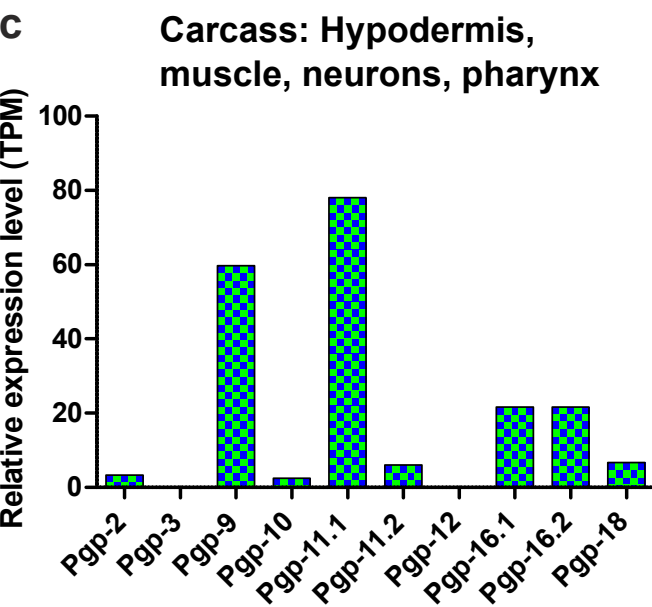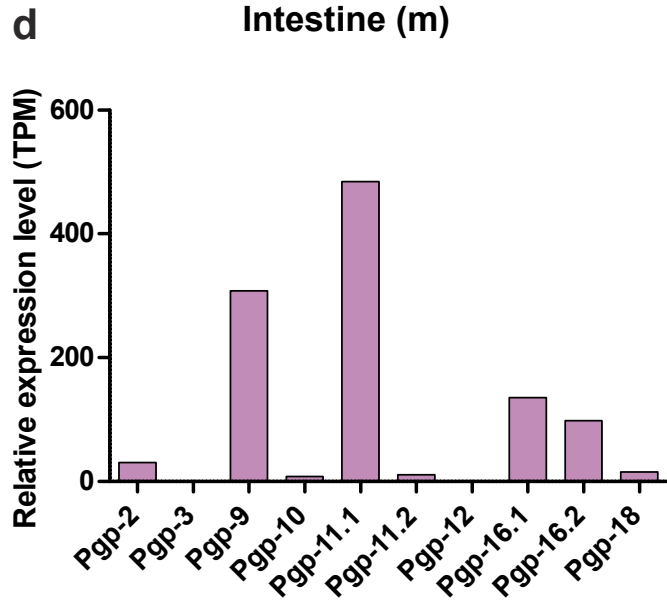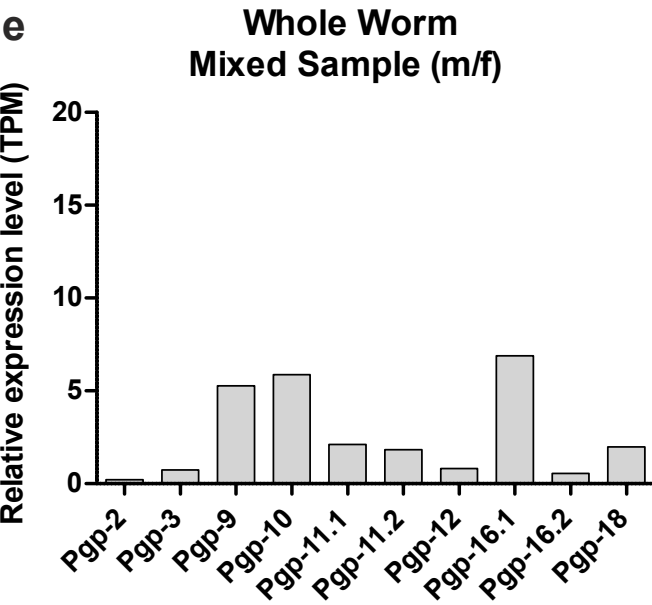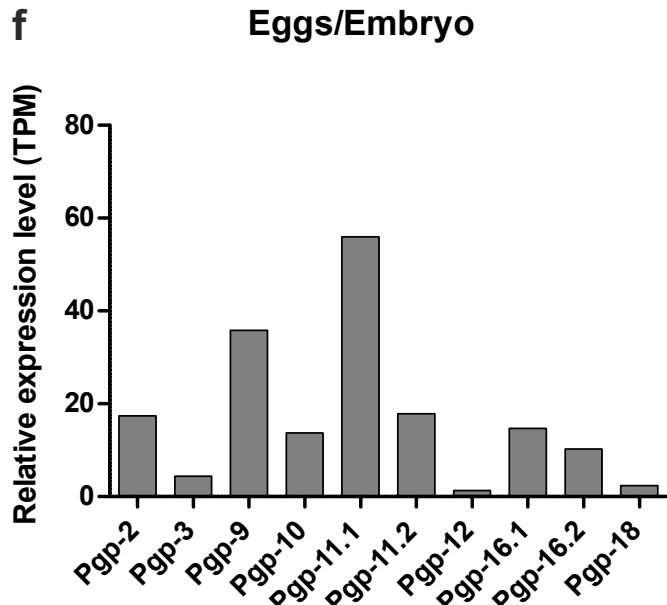

## **Supplementary Figure S2 Tissue expression levels of *Parascaris univalens* P-glycoproteins**

Expression levels of *Parascaris univalens* Pgp were calculated based on transcriptome raw reads data sets (Geo Accession GSE99524, samples GSM2645460 to GSM2645464) mapped onto the augmented (with *P. univalens* Pgp cDNA sequences) *P. univalens* genome (WormBase Parasite genome assembly ASM225920v1, version WBPS14) using STAR. Expression levels were normalised as transcripts per million (TPM) from raw read counts obtained with featureCounts. Then expression levels were visualised by tissue of (a) the ovary (light brown), (b) the testis (brown), (c) carcass tissue including the epidermis, neurons, muscles and the pharynx (blue and green), (d) intestine (purple), (e) a whole worm sample (5'-TeloPrime library), (f) eggs. Pgp: P-glycoprotein; m: Male; f: female; TPM: transcripts per million

**Supplementary Figure S3 RT-PCR of *Saccharomyces cerevisiae* AD1-7 expressing *PunPgp-2*, *PunPgp-9* or *lacZ***

a

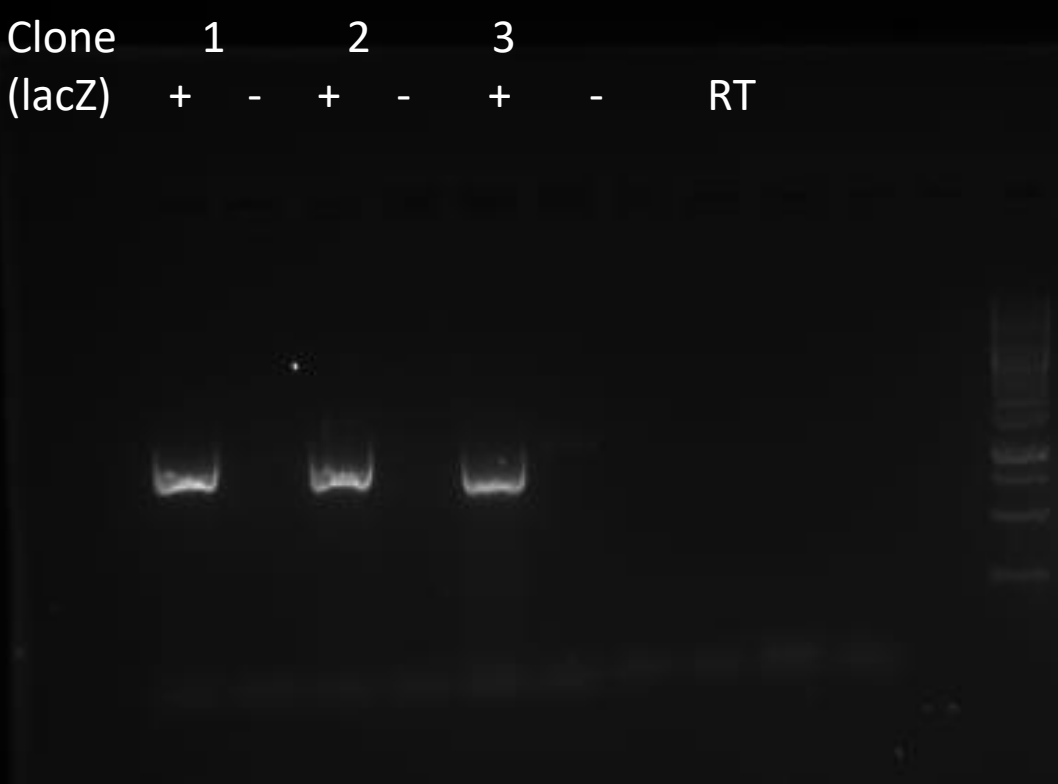

b

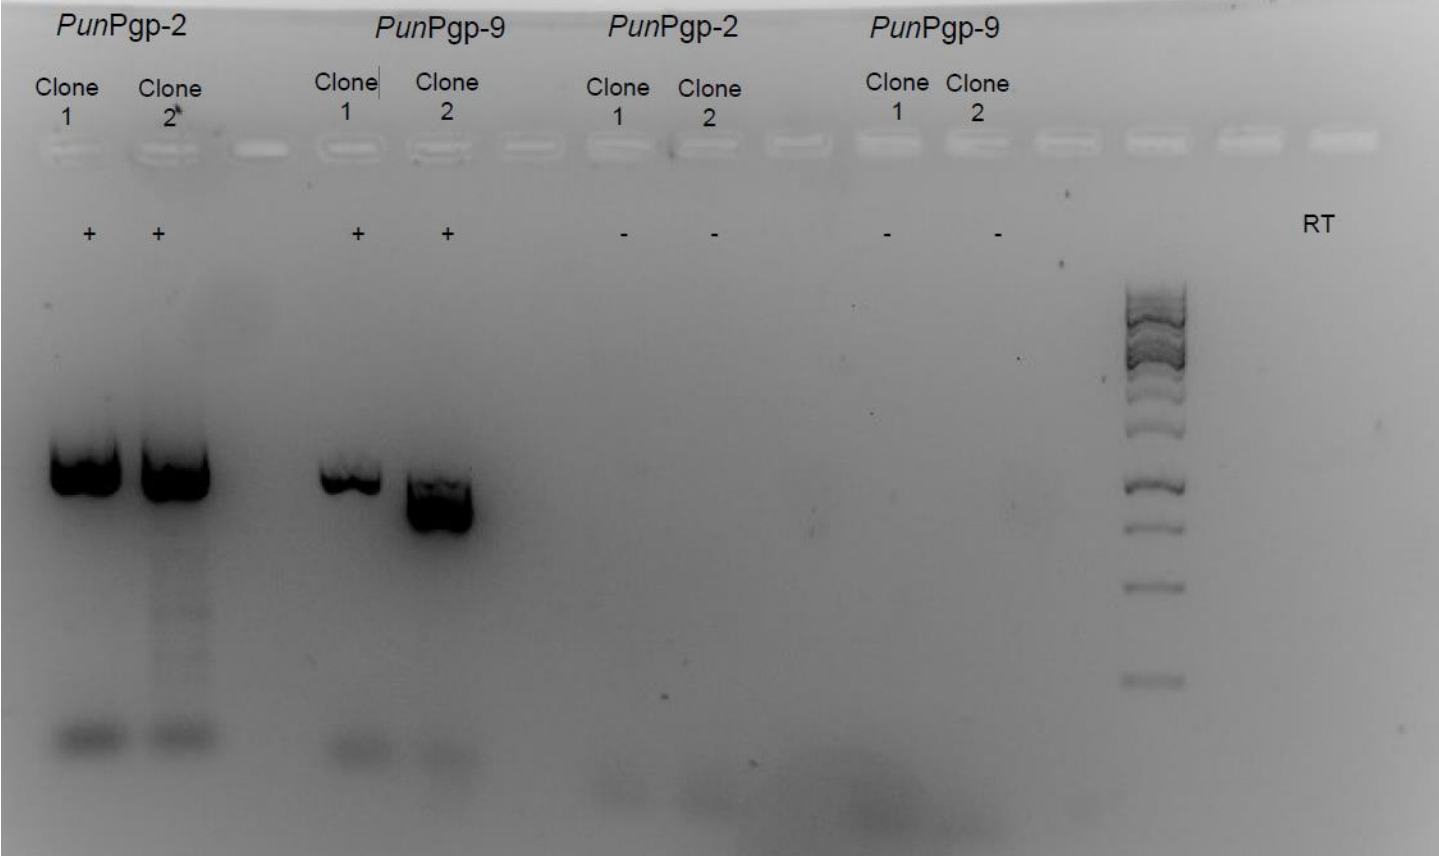

**Supplementary Figure S3 RT-PCR of *Saccharomyces cerevisiae* AD1-7 expressing *PunPgp-2*, *PunPgp-9* or *lacZ***

*Saccharomyces cerevisiae* AD1-7 expressing *lacZ*, *PunPgp-2* or *PunPgp-9* were generated through transformation. Following total RNA extraction and cDNA synthesis including a no-reverse transcriptase (RT) control, RT-PCRs were performed. PCR products were visualised with Gel-electrophoresis. Several clones were screened but only clone 1 for all genes was used for analyses. Pgp: P-glycoprotein. RT: Reverse transcriptase

Supplementary Table S1

Contig Coverage of ORFs in the tissue specific transcriptome assembly

| Contig             | Lenth (bp)                                               | From (cDNA)       | To (cDNA)          | From (contig)    | To (contig)          | Gaps               | Identities  | Identities (%)    | ORF Coverage (%)         |                         |
|--------------------|----------------------------------------------------------|-------------------|--------------------|------------------|----------------------|--------------------|-------------|-------------------|--------------------------|-------------------------|
|                    |                                                          |                   |                    |                  |                      |                    |             |                   |                          | Number of contigs:      |
| <b>PunPgp-2</b>    | cDNA ORF length:                                         | 3864              |                    | 7                |                      | 1                  |             | 3864              | Full ORF Coverage:       | 100.00%                 |
|                    | <b>Contig</b>                                            | <b>Lenth (bp)</b> | <b>From (cDNA)</b> | <b>To (cDNA)</b> | <b>From (contig)</b> | <b>To (contig)</b> | <b>Gaps</b> | <b>Identities</b> | <b>Identities (%)</b>    | <b>ORF Coverage (%)</b> |
|                    | hub_106215_PG_hub_106215_all_transcripts_PgR011_g057_t01 | 3653              | 1                  | 3658             | 21                   | 3653               | 25          | 3622              | 99.0%                    | 94.7%                   |
|                    | hub_106215_PG_hub_106215_all_transcripts_PgR011_g057_t02 | 4339              | 1                  | 3864             | 21                   | 3857               | 27          | 3825              | 99.0%                    | 100.0%                  |
|                    | hub_106215_PG_hub_106215_all_transcripts_PgR011_g057_t03 | 3833              | 1                  | 3841             | 21                   | 3833               | 28          | 3803              | 99.7%                    | 99.4%                   |
|                    | hub_106215_PG_hub_106215_all_transcripts_PgR011_g057_t04 | 3638              | 407                | 3583             | 114                  | 3269               | 21          | 3148              | 99.1%                    | 82.2%                   |
|                    |                                                          |                   | 3376               | 3511             | 3271                 | 3406               | 0           | 136               | 100.0%                   | 3.5%                    |
|                    | hub_106215_PG_hub_106215_all_transcripts_PgR011_g057_t05 | 3552              | 407                | 3583             | 114                  | 3269               | 21          | 3148              | 99.1%                    | 82.2%                   |
|                    |                                                          |                   | 3376               | 3658             | 3271                 | 3552               | 1           | 281               | 99.3%                    | 7.3%                    |
|                    | hub_106215_PG_hub_106215_all_transcripts_PgR011_g057_t06 | 4009              | 407                | 3864             | 114                  | 3527               | 44          | 3404              | 99.7%                    | 89.5%                   |
|                    | hub_106215_PG_hub_106215_all_transcripts_PgR011_g057_t07 | 3525              | 407                | 3583             | 1                    | 3156               | 21          | 3148              | 99.1%                    | 82.2%                   |
|                    |                                                          |                   | 3376               | 3511             | 3158                 | 3293               | 0           | 136               | 100.0%                   | 3.5%                    |
| <b>PunPgp-3</b>    | cDNA ORF length:                                         | 3723              |                    | 5                |                      | 591                |             | 3971              | Overall ORF Coverage (%) | 90.8%                   |
|                    | <b>Contig</b>                                            | <b>Lenth (bp)</b> | <b>From (cDNA)</b> | <b>To (cDNA)</b> | <b>From (contig)</b> | <b>To (contig)</b> | <b>Gaps</b> | <b>Identities</b> | <b>Identities (%)</b>    | <b>ORF Coverage (%)</b> |
|                    | hub_106215_PG_hub_106215_all_transcripts_PgR059_g034_t01 | 3248              | 2113               | 3723             | 1604                 | 3205               | 9           | 1602              | 100.0%                   | 43.3%                   |
|                    |                                                          |                   | 591                | 2112             | 1                    | 1512               | 10          | 1509              | 99.8%                    | 40.9%                   |
| <b>PunPgp-9</b>    | cDNA ORF length:                                         | 3948              |                    | 3                |                      | 1                  |             | 3948              | Full ORF Coverage:       | 100.00%                 |
|                    | <b>Contig</b>                                            | <b>Lenth (bp)</b> | <b>From (cDNA)</b> | <b>To (cDNA)</b> | <b>From (contig)</b> | <b>To (contig)</b> | <b>Gaps</b> | <b>Identities</b> | <b>Identities (%)</b>    | <b>ORF Coverage (%)</b> |
|                    | hub_106215_PG_hub_106215_all_transcripts_PgR025_g103_t03 | 5506              | 1                  | 3948             | 793                  | 4714               | 26          | 3922              | 99.3%                    | 100.0%                  |
|                    | hub_106215_PG_hub_106215_all_transcripts_PgR025_g103_t02 | 5620              | 76                 | 3948             | 981                  | 4828               | 25          | 3848              | 99.4%                    | 98.1%                   |
|                    | hub_106215_PG_hub_106215_all_transcripts_PgR025_g103_t01 | 6823              | 276                | 3948             | 2382                 | 6031               | 23          | 3650              | 100.0%                   | 93.0%                   |
|                    |                                                          |                   | 76                 | 278              | 1749                 | 1950               | 1           | 202               | 100.0%                   | 5.1%                    |
| <b>PunPgp-10</b>   | cDNA ORF length:                                         | 3924              |                    | 6                |                      | 1                  |             | 3924              | Overall ORF Coverage (%) | 100.00%                 |
|                    | <b>Contig</b>                                            | <b>Lenth (bp)</b> | <b>From (cDNA)</b> | <b>To (cDNA)</b> | <b>From (contig)</b> | <b>To (contig)</b> | <b>Gaps</b> | <b>Identities</b> | <b>Identities (%)</b>    | <b>ORF Coverage (%)</b> |
|                    | hub_106215_PG_hub_106215_all_transcripts_PgR090_g012_t01 | 4387              | 1                  | 3924             | 266                  | 4160               | 29          | 3888              | 99.8%                    | 100.0%                  |
|                    | hub_106215_PG_hub_106215_all_transcripts_PgR090_g012_t02 | 2987              | 1144               | 3924             | 1                    | 2760               | 21          | 2757              | 99.9%                    | 70.9%                   |
| <b>PunPgp-11.1</b> | cDNA ORF length:                                         | 3858              |                    | 3                |                      | 1                  |             | 3858              | Full ORF Coverage:       | 100.00%                 |
|                    | <b>Contig</b>                                            | <b>Lenth (bp)</b> | <b>From (cDNA)</b> | <b>To (cDNA)</b> | <b>From (contig)</b> | <b>To (contig)</b> | <b>Gaps</b> | <b>Identities</b> | <b>Identities (%)</b>    | <b>ORF Coverage (%)</b> |
|                    | hub_106215_PG_hub_106215_all_transcripts_PgB04_g139_t01  | 5657              | 1                  | 3858             | 1574                 | 5430               | 24          | 3825              | 99.1%                    | 100.0%                  |
|                    | hub_106215_PG_hub_106215_all_transcripts_PgB04_g139_t02  | 4968              | 1                  | 3858             | 885                  | 4718               | 24          | 3825              | 99.8%                    | 100.0%                  |
|                    | hub_106215_PG_hub_106215_all_transcripts_PgB04_g139_t03  | 4359              | 388                | 3858             | 659                  | 4109               | 20          | 3442              | 99.7%                    | 90.0%                   |
| <b>PunPgp-11.2</b> | cDNA ORF length:                                         | 3909              |                    | 4                |                      | 1                  |             | 3909              | Overall ORF Coverage (%) | 100.00%                 |
|                    | <b>Contig</b>                                            | <b>Lenth (bp)</b> | <b>From (cDNA)</b> | <b>To (cDNA)</b> | <b>From (contig)</b> | <b>To (contig)</b> | <b>Gaps</b> | <b>Identities</b> | <b>Identities (%)</b>    | <b>ORF Coverage (%)</b> |
|                    | hub_106215_PG_hub_106215_all_transcripts_PgB20_g052_t01  | 4103              | 1                  | 3909             | 5                    | 3889               | 24          | 3876              | 99.8%                    | 100.0%                  |
|                    | hub_106215_PG_hub_106215_all_transcripts_PgB20_g052_t02  | 4097              | 1                  | 3909             | 5                    | 3883               | 30          | 3870              | 99.8%                    | 100.0%                  |
|                    | hub_106215_PG_hub_106215_all_transcripts_PgB20_g052_t03  | 620               | 448                | 1070             | 1                    | 620                | 3           | 618               | 99.7%                    | 15.9%                   |
|                    | hub_106215_PG_hub_106215_all_transcripts_PgB20_g052_t04  | 338               | 166                | 386              | 119                  | 338                | 1           | 219               | 99.5%                    | 5.7%                    |
| <b>PunPgp-12</b>   | cDNA ORF length:                                         | 4056              |                    | 3                |                      | 1464               |             | 3971              | Overall ORF Coverage (%) | 61.83%                  |

|                    | Contig                                                    | Lenth (bp)                                               | From (cDNA)        | To (cDNA)   | From (contig)   | To (contig)   | Gaps          | Identities | Identities (%)           | ORF Coverage (%) |                  |
|--------------------|-----------------------------------------------------------|----------------------------------------------------------|--------------------|-------------|-----------------|---------------|---------------|------------|--------------------------|------------------|------------------|
| <b>PunPgp-16.1</b> | hub_106215_PG_hub_106215_all_transcripts_PgR063X_g008_t01 | 1038                                                     | 2929               | 3971        | 1               | 1038          | 5             | 1037       | 99.9%                    | 28.0%            |                  |
|                    | hub_106215_PG_hub_106215_all_transcripts_PgR063X_g007_t01 | 650                                                      | 1917               | 2418        | 152             | 650           | 3             | 499        | 100.0%                   | 13.5%            |                  |
|                    | hub_106215_PG_hub_106215_all_transcripts_PgR063X_g006_t01 | 264                                                      | 1464               | 1728        | 1               | 264           | 1             | 264        | 100.0%                   | 7.1%             |                  |
|                    | cDNA ORF length:                                          | 3855                                                     | Number of contigs: | 2           | Coverage Start: | 84            | Coverage End: | 3855       | Overall ORF Coverage (%) | 97.85%           |                  |
|                    | Contig                                                    | Lenth (bp)                                               | From (cDNA)        | To (cDNA)   | From (contig)   | To (contig)   | Gaps          | Identities | Identities (%)           | ORF Coverage (%) |                  |
|                    | hub_106215_PG_hub_106215_all_transcripts_PgR011_g140_t01  | 5610                                                     | 84                 | 833         | 1165            | 1909          | 5             | 744        | 99.2%                    | 19.5%            |                  |
|                    | hub_106215_PG_hub_106215_all_transcripts_PgR011_g140_t02  | 5024                                                     | 829                | 3855        | 2490            | 5497          | 19            | 3004       | 99.2%                    | 78.5%            |                  |
| <b>PunPgp-16.2</b> | hub_106215_PG_hub_106215_all_transcripts_PgR011_g140_t02  | 5024                                                     | 84                 | 3855        | 1165            | 4911          | 25            | 3742       | 99.9%                    | 97.8%            |                  |
|                    | cDNA ORF length:                                          | 3864                                                     | Number of contigs: | 5           | Coverage Start: | 1             | Coverage End: | 3864       | Overall ORF Coverage (%) | 100.00%          |                  |
|                    |                                                           | Contig                                                   | Lenth (bp)         | From (cDNA) | To (cDNA)       | From (contig) | To (contig)   | Gaps       | Identities               | Identities (%)   | ORF Coverage (%) |
|                    |                                                           | hub_106215_PG_hub_106215_all_transcripts_PgR011_g141_t01 | 5174               | 1           | 3864            | 625           | 4462          | 26         | 3835                     | 99.2%            | 100.0%           |
|                    | hub_106215_PG_hub_106215_all_transcripts_PgR011_g141_t02  | 5170                                                     | 1                  | 3864        | 621             | 4458          | 26            | 3835       | 99.2%                    | 100.0%           |                  |
|                    | hub_106215_PG_hub_106215_all_transcripts_PgR011_g141_t03  | 6530                                                     | 1                  | 3864        | 1981            | 5818          | 26            | 3835       | 99.9%                    | 100.0%           |                  |
|                    | hub_106215_PG_hub_106215_all_transcripts_PgR011_g141_t04  | 7109                                                     | 1                  | 3864        | 2560            | 6397          | 26            | 3835       | 99.9%                    | 100.0%           |                  |
|                    | hub_106215_PG_hub_106215_all_transcripts_PgR011_g141_t05  | 3529                                                     | 411                | 3124        | 810             | 3505          | 20            | 2692       | 99.9%                    | 70.2%            |                  |
| <b>PunPgp-18</b>   | cDNA ORF length:                                          | 3888                                                     | Number of contigs: | 1           | Coverage Start: | 1             | Coverage End: | 3888       | Overall ORF Coverage (%) | 100.00%          |                  |
|                    |                                                           | Contig                                                   | Lenth (bp)         | From (cDNA) | To (cDNA)       | From (contig) | To (contig)   | Gaps       | Identities               | Identities (%)   | ORF Coverage (%) |
|                    | hub_106215_PG_hub_106215_all_transcripts_PgB01_g089_t01   | 4070                                                     | 1                  | 3888        | 26              | 3892          | 37            | 3858       | 99.8%                    | 100.0%           |                  |

**Supplementary Table S1.** Contigs encoding P-glycoproteins of the tissue specific transcriptome (GEO accession number: GSE99524). For each P-glycoprotein ORF and for each contig length, ORF coordinates (from/to cDNA) as well as the corresponding contig coordinates (from/to contig), gaps, identities, identity percentage and ORF coverage (ignoring gaps) is listed. Number of contigs vary strongly between Pgp and do not correspond to their expression level. Complete ORF coverage was not available for several Pgp. Pgp: P-glycoprotein



## Supplementary Table S2

### a) Full Length P-glycoprotein Open Reading Frame Primers

| Gene               | Direction | contig of origin                                             | Sequence (5'-3')                          | Primer length | Tm (°C) | Fragment Size (bp) |
|--------------------|-----------|--------------------------------------------------------------|-------------------------------------------|---------------|---------|--------------------|
| <i>PunPgp-2</i>    | Forward   | hub_106215_PG_hub_106215_al<br>l_transcripts_PgR011_g057_t02 | ACTGGTGGTTATCAA<br>CGTG                   | 19            | 71.4    | 4065               |
|                    | Reverse   | hub_106215_PG_hub_106215_al<br>l_transcripts_PgR011_g057_t02 | ATCCACACTACAAAA<br>CGTGA                  | 20            |         |                    |
| <i>PunPgp-10</i>   | Forward   | hub_106215_PG_hub_106215_al<br>l_transcripts_PgR090_g012_t01 | CAACTTGTTCCGGCA<br>GCTTCAGTTTACCGA<br>CAA | 32            | 55.0    | 4547               |
|                    | Reverse   | hub_106215_PG_hub_106215_al<br>l_transcripts_PgR090_g012_t01 | GAGAAGTGGTAGAA<br>CAAAGGATGAGGTG<br>ATAA  | 32            |         |                    |
| <i>PunPgp-3</i>    | Forward   | comp75122_c0_seq1                                            | TGAGAGATGTCTTCA<br>CGAAGAAAGG             | 25            | 55.0    | 4091               |
|                    | Reverse   | comp75122_c0_seq1                                            | CAACTTAAAAGATCT<br>TGTTTCCTGA             | 25            |         |                    |
| <i>PunPgp-18</i>   | Forward   | hub_106215_PG_hub_106215_al<br>l_transcripts_PgB01_g089_t01  | CTATCAGGTAAAGT<br>GAATCCAAGAAATG<br>GGT   | 31            | 65.0    | 4120               |
|                    | Reverse   | hub_106215_PG_hub_106215_al<br>l_transcripts_PgB01_g089_t01  | ATTGATTAAGAGATG<br>AAATGAATGATAGC<br>GAA  | 32            |         |                    |
| <i>PunPgp-11.2</i> | Forward   | hub_106215_PG_hub_106215_al<br>l_transcripts_PgB20_g052_t01  | AAAATGACCGACAA<br>CGACAAGTCAAAAT<br>GCAG  | 32            | 60.0    | 4105               |

|                    |         |                                                              |                                          |    |      |      |
|--------------------|---------|--------------------------------------------------------------|------------------------------------------|----|------|------|
|                    | Reverse | hub_106215_PG_hub_106215_al<br>l_transcripts_PgB20_g052_t01  | TTTCCTTGTTAGATA<br>TAACGAAACGCTCAT<br>GG | 32 |      |      |
| <i>PunPgp-3</i>    | Forward | comp75122_c0_seq1                                            | ATGGCACGATTCAT<br>GTCAAGGTTCTATC         | 28 | 55.0 | 3765 |
|                    | Reverse | comp75122_c0_seq1                                            | GATGGTTTCTGTGAT<br>ATATAGCGTTTCTCT<br>CT | 32 |      |      |
| <i>PunPgp-16.2</i> | Forward | hub_106215_PG_hub_106215_al<br>l_transcripts_PgR011_g141_t01 | GCTACTAATCGTCTA<br>GCTCTATTGGTCATC<br>AA | 32 | 60.0 | 4332 |
|                    | Reverse | hub_106215_PG_hub_106215_al<br>l_transcripts_PgR011_g141_t01 | TTTCTAGGCCTGCT<br>GCTATTCCTTTATTG<br>CAA | 32 |      |      |
| <i>PunPgp-9</i>    | Forward | hub_106215_PG_hub_106215_al<br>l_transcripts_PgB04_g139_t01  | TCTCTCGTCGATGTT<br>CACACGTT              | 23 | 59.0 | 4110 |
|                    | Reverse | hub_106215_PG_hub_106215_al<br>l_transcripts_PgB04_g139_t01  | TGGTGATTATCGCA<br>GCAACAGG               | 22 |      |      |

### b) Additional Primers

| Gene             | Direction | contig of origin                                              | Sequence (5'-3')             | Primer length | T <sub>m</sub> (°C) | Fragment Size (bp) | Purpose                  |
|------------------|-----------|---------------------------------------------------------------|------------------------------|---------------|---------------------|--------------------|--------------------------|
| <i>PunPgp-12</i> | Forward   | hub_106215_PG_hub_106215_al<br>l_transcripts_PgR063X_g008_t01 | TCAACTTCTAAGCAGAG<br>AGGCACG | 24            | 65                  | 634                | Verification of fragment |
|                  | Reverse   | hub_106215_PG_hub_106215_al<br>l_transcripts_PgR063X_g008_t01 | ATCGTGGTTCTTGTCCC<br>ACCAATG | 24            |                     |                    |                          |

|              |                                                               |                                   |    |    |            |                                                |
|--------------|---------------------------------------------------------------|-----------------------------------|----|----|------------|------------------------------------------------|
| Forward      | hub_106215_PG_hub_106215_al<br>l_transcripts_PgR063X_g008_t01 | AGGTCTCGACACAGAAG<br>TTGGAGA      | 24 | 62 | 226        |                                                |
| Reverse      | hub_106215_PG_hub_106215_al<br>l_transcripts_PgR063X_g008_t01 | TGCTGAATTG<br>ACGATAGTCG ATGTGC   | 28 |    |            |                                                |
| Forward      | comp29735_c0_seq1                                             | TCTTcACGAAGAAAGGT<br>TCAAGATGAGCA | 29 | 65 | 421        |                                                |
| Reverse      | comp29735_c0_seq1                                             | GATAGGCGGCAAGGAG<br>AAATTCG       | 23 |    |            |                                                |
| Forward      | comp29735_c0_seq1                                             | CGGCAGGTTTCATAACA<br>ATTTATCG     | 25 | 65 | 270        |                                                |
| Reverse      | comp29735_c0_seq1                                             | TAACATACGAGCGTCGA<br>TTACCGC      | 24 |    |            |                                                |
| Forward      | hub_106215_PG_hub_106215_al<br>l_transcripts_PgR063X_g008_t01 | TCAACTTCTAAGCAGAG<br>AGGCACG      | 24 | 65 |            | Verification<br>of<br>g008/29735<br>as one Pgp |
| Reverse      | comp29735_c0_seq1                                             | TAACATACGAGCGTCGA<br>TTACCGC      | 24 |    |            |                                                |
| Forward      | Splice Leader (SL) <i>Ascaris suum</i>                        | GGTTTAATTACCCAAGT<br>TTGAG        | 22 |    |            | Amplificatio<br>n of 5' end                    |
| Reverse      | Sequencing product of<br>PgR063X_g008_t01                     | AGTGATACTGGTTTTGC<br>CTCG         | 21 | 60 | unspecific | Reverse for<br>SL                              |
| Reverse<br>2 | Sequencing product of<br>PgR063X_g008_t01                     | TTGTTTCGCCAATCAA<br>GCC           | 20 | 60 | ~220bp     | Nested SL<br>reverse                           |
| Forward      | Sequencing product of<br>comp29735_c0_seq1                    | GTGCGTTTCGATGGACG<br>TGAC         | 22 | 70 |            | 3'RACE                                         |
| Forward      | Sequencing product of<br>comp29735_c0_seq1                    | AGAAATCAGATGGCATT<br>GGCGG        | 23 |    | 700bp      | nested_1<br>(3'RACE)                           |
| Forward      | Sequencing product of 3' RACE<br>SP6                          | GGGTCTCGACACAGAA<br>GTTGGAGA      | 24 |    | 600bp      | nested_2<br>(3'RACE)                           |

## c) Full Length P-glycoprotein Sequencing Primers

| Gene             | Forward Primers | Sequence (5'-3')         | Reverse Primers | Sequence (5'-3')         |
|------------------|-----------------|--------------------------|-----------------|--------------------------|
| <i>PunPgp-2</i>  | M13-24F-BLUE    | GTAAAACGACGGCCAGTGAGCGCG | M13-24R-BLUE    | AACAGCTATGACCATGATTACGCC |
|                  | F1              | CGTCAGAAATATCTGAAAGCAATA | R1              | GTGTATGTTGGCTAATTTGGCG   |
|                  | F2              | GCTGGATCGAGAAGTTTCACAC   | R2              | CATCAGTGAGACGAGCGGTAAG   |
|                  | F3              | TATTCGATGGAACCATCGAGAGTA | R3              | TCCCGGTGGAATGTCTTTGATCAT |
|                  | F4              | TTGTGCACTCGATTTGCGACCGAT | R4              | CGGTTCTTGCGATACGATTCCGAT |
|                  | F5              | GTGCAGCAATCGTCAAAGAACT   |                 |                          |
| <i>PunPgp-10</i> | M13-24F-BLUE    | GTAAAACGACGGCCAGTGAGCGCG | M13-24R-BLUE    | AACAGCTATGACCATGATTACGCC |
|                  | F1              | TCTCGTTGGCGGTTTGTTTC     | R1              | AGGTAAAATCGGCCTTGAAGG    |
|                  | F2              | TCCAATGGGCGTTTAATGCT G   | R2              | ACATCACCCAGTGTCACATC     |
|                  | F3              | TCTGGTGGTCAAAGCAACG      | R3              | ACCGGAAGAGCTATTCCAAG     |
|                  | F4              | TCGTTACCCGGTAAGGATAC     | R4              | ACGTATAACAGCTCGGGCGA     |
| <i>PunPgp-18</i> | M13-24F-BLUE    | ACGATGATCGATCGATACTCG    | M13-24R-BLUE    | AACAGCTATGACCATGATTACGCC |

|                    |              |                       |              |                          |
|--------------------|--------------|-----------------------|--------------|--------------------------|
|                    | F1           | TCGATTCTCACAGGTGCAAC  | R1           | TGCGAAGTCCATTGCTACTG     |
|                    | F2           | ATGGGCGAGTGGTAGAGACG  | R2           | AGTGACATCTGCCAACCGAAG    |
|                    | F3           | ATGTCACTCGTTACTCTTGTA | R3           | AGATCGACTGTCGTCCATGT     |
|                    | F4           | GATGACGATCCAGATGACGGG | R4           | CAGGTTCTATCTCACCTGAGC    |
| <i>PunPgp-12</i>   | M13-24F-BLUE | ACGATGATCGATCGATACTCG | M13-24R-BLUE | AACAGCTATGACCATGATTACGCC |
|                    | F1           | AGGTGCTATTGCCGAGGAATC | R1           | TAGCCCAGCAGCAGTTCTTG     |
|                    | F2           | TCCTGAGGGATATCAGACTC  | R2           | ATATGCACCCGCAAGTGCTC     |
|                    | F3           | ATGTCTTTTCGAGCACTTGCG | R3           | GTCTGATATCCCTCAGGAAG     |
|                    | F4           | CAAGAACTGCTGCTGGGCTA  | R4           | ATTCCTCGGCAATAGCACCTG    |
| <i>PunPgp-11.2</i> | M13-24F-BLUE | ACGATGATCGATCGATACTCG | M13-24R-BLUE | AACAGCTATGACCATGATTACGCC |
|                    | F1           | TGCTACAGGC GATATTGACG | R1           | ATCGCCTGTAGCACTCTCTG     |
|                    | F2           | TGCTACAGGC GATATTGACG | R2           | TCGAGTATCGATCGATCATCG    |
|                    | F3           | TACTGGATGAAGCGACTAGC  | R3           | TGCTCTGGGTTCTCTTGTT C    |
|                    | F4           | TTCACTTTTCGGCATCGAGC  | R4           | AGAGAACCCAGAGCATGGAA C   |
| <i>PunPgp-3</i>    | M13-24F-BLUE | ACGATGATCGATCGATACTCG | M13-24R-BLUE | AACAGCTATGACCATGATTACGCC |

|                    |              |                          |              |                          |
|--------------------|--------------|--------------------------|--------------|--------------------------|
|                    | F1           | TGAAGAAGGCTCGTAAGATGGG   | R1           | AGCACCGGTAAATATTCCCGTC   |
|                    | F2           | TTCAAAGGCTCTTGACCAGGC    | R2           | TCGCTTTCTGTGTCCAACGCAC   |
|                    | F3           | TGATAGCAGGAGTTGGAATCGC   | R3           | GATAGCAGGAGTTGGAATCGCA   |
|                    | F4           | TATCTGAAGCGGGTCTACGTCAG  | R4           | TTGTCGTCGATTGGGATAAGCG   |
| <i>PunPgp-16.2</i> | M13-24F-BLUE | ACGATGATCGATCGATACTCG    | M13-24R-BLUE | AACAGCTATGACCATGATTACGCC |
|                    | F1           | ACATCTCGTGAAGCGACGTTG    | R1           | GTACAAGGTCAGCTCGATTG     |
|                    | F2           | CAATCGAGCTGACCTTGTAC     | R2           | TCTTCCAACGTCGCTTCACG A   |
|                    | F3           | GATTGCAAGACGTCCATCAG     | R2-1         | TTGGTGACAACTGGGCAAG      |
|                    | F4           | TAGTTCCTCTGATGCAGGAC     | R3           | CCACTTATAGTCGTCGCAAC     |
|                    | F5           | GATGCGGCTATTTTGTCGAG     | R4           | GTGTCTGTCTG CATTCTTCTT C |
|                    | F6           | AAGTGGCCAATAAACCGGCAC    | R5           | TCATCGAGCGTTCCGAATTG     |
|                    | F7           | TCGCATTTCGCCTATTGTGCAG   | R6           | TGGTGCACAATTTCCGCAAC     |
| <i>PunPgp-9</i>    | M13-24F-BLUE | GTAAAACGACGGCCAGTGAGCGCG | M13-24R-BLUE | AACAGCTATGACCATGATTACGCC |
|                    | F1           | GAGTCAGTTCTTTGCCGATT     | R1           | GTGAGAGTGACATCATAATCAA   |
|                    | F2           | TTGGACCAAGTGGATGTGGTAA   | R2           | ACAGTTCCATCAATTGGGTCAT   |

|  |    |                          |    |                        |
|--|----|--------------------------|----|------------------------|
|  | F3 | GGAAACGAGGATGTCACTGAG    | R3 | CGCTCCTACGACAAGAAACATG |
|  | F4 | GATCAGATGC TCAGCAATGG TC | R4 | CTCAGTGACATCCTCGTTTC C |
|  | F5 | TTCGCATATCCAGAACGACCAG   |    |                        |

d) Codon optimized constructs for expression in *Saccharomyces cerevisiae* of *PunPgp-2* and *PunPgp-9*

>*PunPgp-2\_codon\_optimized*

ATGATGCGTTCAAGTCAGGATAATGAAAAAGTTCCGCTGATTTTCAGCCAGTATTGCGTCATACGAGTCTTTTAACTCA  
AGCAATTGCAAGCGTCCTTCATCCCTTAAGGTCAAGGAGAAAGGGCTTTTCTCATACACGACGTGTCTAGACTATTG  
TCTAATCCTTATGGGCACCTTCGCAGGTATAGCACACGGAACCGGCTTTCCCTCTTTTAAGTATAGTGCTAGGGGGGA  
TGACAACGATATTCCTGAGAGCCGAGAACTCCGACTTTGTTTCGTGGTTATTCTGTTATAGTCAACAATTCAGCCCTTA  
GCCAGATTACGAAGGAAGAGTTCGACGCTTCTGTTACCACCTATTGCCTTTACTACCTATTGATAGGCGTATTTATGT  
TTATATCCAGCTATATACAGATCGCTTGCTGGGAGTCTTTTAGTGAGAGAACCACTCATAGGATAAGACAAAAATATT  
TAAAAGCGATACTGAGGCAGCAAATTGCCTGGTTCGATACCCAACAGAGTGGCAATCTTACGGCCCGTTTGACTGA  
CGACCTGGAACGTGTTAGAGAGGGGTTAGGCGATAAGCTAAGCATGATGATTCAACTGATGGCCGCTTCATCGCG  
GGATTTATAGTCGGCTTTATATATAATTGGCGTATGACTCTAGTGATGATGGCTTTCGCCCCATTGAACGCCCTGACA  
GGCGCATGGATGTCTCGTATGGCGGCGACGAGAACACAGGTCGAGCAAGAGAAGTATGCTGTGGCCGGGGCTATA  
GCAGAAGAAACCTTTAGTAGCATAAGAACCGTTCATAGTCTGAACGGAGCAACCAGAGAAATCGCAAGATATGAGAA  
GGCCTTAGAGGATGGGAGGCGTACTGGGCGTTTGAAATACTTATATCTTGGGACCGGAATGGCGTTGAATTACCTT  
ATTGTGTATGCCAGCTACGCAGTGGCCTTTTGGTACGGCAGTCTGATCATAATCGGTGATCCGACTTTCGACAGAGG  
CTCCGTGTTACGGTATTCTTTAGTGTGATGAGTGGAAGCATGGCGCTAGGTGGTGGCCTTCCAAACATGGCTACTT  
TTGCTATGGCGAGAGGTGCAGCAAGAAAAGTACTGAGTGTCAACAGTGTGCCTATTATTGACCCTTACTCCAGC  
AGTGGTACATTTCCCTCAAAGCTAAAGGGGGCGATCAGTTTTCAAATGTGTCTTTTCCCTATCCGATCCGTAAAGAC  
ATTCAAATTTTGGACCGTATTACTTTTATATTAGTCCCGGTAGAAAAATCGCGTTGGTGGGAAGCAGTGGTTGTGG  
GAAATCTACCGTGATGCACCTGCTTTTGGAGGTTTTATGATCCGGACCTTGGTATGGTACTCTTATGATGGTTATGACAT  
TCGTAGTCTTAATGTCCGTCGTCTGAGGGATGCAATAGGGATAGTGAGCCAAGAGCCGATACTGTTTATGATGGCAGC  
ATAGAATCAAATATCCGTCTTGGGTGGGAGAAAGCTACGAGAGAGGACATTGTCAGGGCATGTAAACAAGCTAACG  
CTTGGGAATTTATTCAGCTTCTGCCCCGACGGGCTTAGTACCAGAGTAGGCGAGCGTGGCGTGCAACTATCAGGGGG  
CCAGAAACAAAGAATTGCCATTGCACGTGCACTAATAAAGGATCCCCAAATTTGCTTCTGGACGAGGCAACCAGCG  
CACTTGACACGGAGAGCGAATCCGTAGTACAAAAGGCTCTTGAACAGGCTCAGATCGGTAGAACTACAATCACGATT  
GCACACCGTCTGTCAACTATCAGGGACGTGGATGAGATCCTAGTCTTTAAAACGGATCCATCGTCAAGGGGGAA  
CGCACATAGAGTTAATTGCCGCGCGTGGACTATACTACGGAATGGTGTCTTGGCGAAGATATAAACCAACAGACTGAA

ATGATCGATGATGAAATGGACGAGGTCGACGATGTAGACGACCGTAGTTCTAATTTGGATGTCGTTTCGTAAGAAAAG  
 GTCAATTGCGAATTCTTACCACAGATCCGTGTCCGACCCTTCAGAATTATCTCTTAGGTCTTCAGCCGCAATCGTAAA  
 AGAGCTTCAGGACGCCGCGGAGGAGAGCTCAGTAAGACCTACACCGATGTCACGTATTTTTCTTATGAATAGAGAAA  
 CTTGGCCATATCTTTTCGTGGGACTGGTCGGTTGCTGCTTAAGTGGTATCGTCCCGCCCTTCTTTGCATTGGTTTATA  
 GTCAGATATTCAGCGTCTTCTCCGAACCGGTAGACAGACTTGGGAGCGACGCTCGTTTCTGGTCCCTTATGTTCTTA  
 GCATGTGGAGTGATCGATGCTATAGGTTTTTTCATTTCCGCCAACATGCTTGGGCTATGTGGAGAAACGCTGACGAA  
 AAAAATTAGGTTGATGGCTTTCACCAACTTATTGCGTCAAGATATAGCCTTCTATGACGATCAGAGACACTCAACGGG  
 GAAGCTTTGCACACGTTTTGCGACAGACGCGCCGAACGTCCGTTACGTCTTTACCCGTTTACCACTGGTAGTTGCGA  
 GCGTTGTAACCTAGTCGGCGCTATTGCGATTGGGTTCTGTTTGGGTGGCAACTAGCCTTAATCTTGCTAGCAATC  
 GTACCGCTAATTCTTGGCTCTGGTTATGTAGAAATGAGACTTCAGTTCGGGAAGCAGTTGAGGGAGACCGAGCTACT  
 AGAAGAAGCCGGGAGAACAGCGACCGAGGCCGTAGAGAATACGTACAGTACAGTCACTTAATAAGCAGTCCGCT  
 TTTATCAGAGAATACTCACAACACTTGGAAACCCCTTTTAGGGAAAATATGCAGAGAGCACACATCTACGGAGCTGT  
 TTTTCGCTTCTCACAATCCTTAATCTTCTTCATGTATGCGTTAGCATTTTGGTTAGGTTCTTTATTTGTGACAATGCG  
 GTGATGCAACCCATCAACGTTTACAGGGTGTTTTTCGCGATTGCTTCTGCGGCCAAAGCGTGGGGCACATCAGTG  
 CCTTTATTCCGGACGTGGTTAAAGCACGTTTAGCCGCAAGTTTGGTCTTTCACCTAAGCGAGTATCCGACGGCCATA  
 GACTCATTGAGCGATCAAGGTAGTAGAATAACTATAAAGGGTGCTATCCAGTTAAAGAATGTTTTCTTTTCCTACCCG  
 ACAAGACGTAATACAAGAATATTAAGAGGCTTGACACTTAATGTCAAGGAGGGCGAAACGGTTGCACTTGTGGGCA  
 CTCTGGCTGTGGGAAATCCACAGTTATGGGTCTGCTTGTGAGCGTTTTTACGACCCTAACAGAGGGCAACATACGTTG  
 ACGGAGAGAACATCAGAGACGTAAACATTAAGTGCTTGTGAGGTCCCAAATGTGTATTGTAAGCCAGGAACCCATACTA  
 TTTGATTGCACGATTGAGGAGAACATAATGTACGGACTGGACAGGGAAGTGAGCCATGAGGAGGTGGTCAACGCTG  
 CCAAACCTGGCTAATATCCATAAATTTATCTTAAGCTTGCCCCTGGGGTATGAAACTAGGGTCCGGTGAAAAAGGGACC  
 CAGTTGAGCGGCGGACAAAAGCAGCGTATAGCGATAGCAAGGGCATTGATAAGAAATCCAAGCATTCTACTTCTAG  
 ACGAAGCAACCTCCGCTCTTGATACAGAATCTGAACAGGTGCTTCAAGAAGCTTTAGAAAACGCGCGTAAAGGTAG  
 GACTTGTCTTGTGATAGCCCATAGACTGAGCACAATTCAAATTTCAAATTTGATTGTTGTAATCAACGAGGGTAAGGT  
 TGCTGAGAAGGGCACCCATGCACAGTTGCTAGAGGCCAGCGGCATTTACAAAACACTGTGTGAGACGCAGACACTG  
 GTAGCTGCCAGTTATCCATACGATGTCCCTGATTATGCATGA

>*PunPgp-9\_codon\_optimized*

ATGTCCATTCGTAGCTCTCATAAGCGTAGAGATAACCTTTTTGTCAGTCCCCTTATTGAGATCATTGAGAAAACGTCAG  
 AGCGAGGAACCGAAGGAGACCCCGCCGCTAAGGCCTCCCTGAAACAACCTGTTGCGTTATACCTCAACTTTTGACC  
 GTGCTTTGTTTTCGGTGGGCTCTAGTTGCCATTGGTACAGGCTGTGGGTTTCCGCTTCTGAGTATTCTAATGGGG  
 TCTATGTCCCAGTCCTTTGTGACGCGCAGACCGCGTATTACGCTGGCTTTCGCTCCGCATCTTAACACTACTATCGA  
 TAATGTAGAAGTCCCGCCTAGCTTGGAGAATTTACCTGGGATGGCTTTAGTGACCAGGTGATTACATACTGTCTAG  
 ATTACGTTTGGATAGGTATTGCTATTTTATGCGCGGCAACGATTCAGGTGATGTGTTACCTTACTGCCTGTGAGAACA



TGAACACAGAATGAGAAAGGAGTTCTTCAAGGCGGTTATCAGGCAAGATATCGGGTGGTTTGACGAAAATCAATCA  
GGAACCCCTGACTGCTAAGCTTTTCGACAACCTTAGAAAGGGTGAAAGAGGGTACCGGTGATAAGATTGCTTTAATGAT  
CCAGTTTATGAGTCAATTCTTCGCCGGCTTTATCATCGCATTTACATACGATTGGAGATTGACACTGATTATGATGAG  
CCTGTCTCCTTTTATGGTAATTTGTGGGGCATTTCATGGCAAAATTGATGGCAAGCGCGACTGCTAAGGAGGCAGAGA  
ATTATGCCGTTGCCGGGGGAATCGCAGAGGAGGTCTTAACGTCAATACGTACAGTGGTGGCTTTCAACGGGCAGAA  
GATTGAGTGCACAGATATAACGAAGCTCTAAAAGGAGGAATGAGGGATGGGATATTAATAATCTTTGTACGTAGGTA  
TAGGGCTTGGGCTTACTTTCTTCATTATATTTCGGTTCCTACGCCCTAGCGTTCTGGGTTGGCACGGGATATGTGTAC  
AATGACGTTCTAATTCCAGGTACCCTTCTAACTGTCTTTTTTGCGGTAATGATGGGCTCAATGGCGCTTGGGCAAGC  
AGGCCCTCAATTCGCCGTCTTTGGGAGCGCTTTAGGCGCAGCCGGTGCATTGTTTGAATAATTGATAGGGTGCCC  
GAAATCGACACATATGACGAATCAGGGGAAAAGCCTGAACAGATGAAAGGCCAAAATCGAACTTAGGAATATTGAGTT  
CAGTTACCCGACGAGACCGGATATCAAATACTAAACGGAATTTCTTTTTCCGTTAATCCTGGGGAAACAGTTGCGTT  
GGTAGGCACTAGCGGCTGTGGCAAGTCTACCATAGTGTCTCTTTTGTACGTTATTACAACCCGGAGTATGGAAACA  
TCCTGATTGACGGCCATGAGATTTCTTCACTGAACTTGGCGTATCTGCGTAAGATGATCGGCGTTGTATCCCAGGAA  
CCAGTTCTGTTTAATATGACGATTAAGGAGAACATCGAAATGGGCAACGAGGATGTTACCGAGGGAGAGATCTTGG  
CCGCTTGCAGACGTGCTAACGCTACAACTTCATTAACCAACTTCCGAATAAGTACGAAACGATAGTGGGTGACAGA  
GGTACACAATAAGTGGAGGGCAAAAACAAAGAATCGCTATAGCGCGTGCCTAGTTAGGAACCCAAAAATACTTCT  
ATTAGACGAAGCTACTTCCGCTCTAGACGCAGAGAGCGAATCAATAGTGCAGGAGGCGTTAGAGAAAGCAGCTCAG  
GGACGTACCACAATCGTGATAGCGCATAGATTGTCTACTATCAAGAACGCGGACAAGATCATCGCAATGAAAGATGG  
ACGTATCATTGAGATTGGAACGCACAACGAGCTTATTGCGGCCAATGGTTTTTATAGAGAGCTTGTGAATGCCCAGG  
TATTCGCAGACGTTGATGAGAAACCCGCTCAGGAGAAAAGAACCCTGCCTATAGAAGCCCCAGTATTATAAGCAGA  
AGGAGCAGGCTTAGCTCCACCATGTCCGAGAAAGATGCGCCTTTGTCTCCTAAGTTCACCAGTAGAATAGAATCTGA  
GACTGGGGTCGACCCCACTGACCAGCAGGACATAAAGAAAGAAACGGAGAGGTTGCGTAAAGAAATGGAGGAGGA  
AGGCGTGACAGAGTCTAATTTGATAGAAATACTTCAGTACGCTAGACCTGAGTGGATATATATAATATTAGGCTTGT  
CGCATGCCTTATAACAAGGTAGTGTATATCCTGTCTTTAGTTTACTATTTAACGAGATTCTGGCGATCTTCGCGAAACC  
TAGGGATCAGATGCTAAGTAATGGACACTTTTACTCCCTGATGTTCTTGGTGGTGGGTGCGGTATCTGCGACTACAC  
TACTAATTCAGGCCTTTTTCTTTGGTATGTCCGCCGAGCGTCTTACGAGAAGGTTAAGGTCACGTATATTTCAGAACG  
TACTTAGGATGGATATTGCGTACTTCGACATGCCTAACCAATTCAAGCGGCAAGATTTCCACGAGGCTGGCCACGGA  
CACACCAAATGTGAAGTCTGCCATAGACTATAGACTGGGCTCAGTTTTAAGCAGCCTGGTTTCAGTAGGTTTCGGGA  
TAGGCATTGCTTTTTATTTGGTTGGCAGATGGCACTTCTTGTATCGCTATATCCCGCTTGCAGGTGTCCGGCCAG  
GCTTTCCACTTAAAGTATATCGAGGGCAGGCACAATCAAGATGCTAAGGAGCTTGCAGCTCTGGTAAGGTCGCCTT  
GGAAGCGATTGAAAGTATCAGGACGGTTCATGCCCTAACCTAGAGCGTAAATTCTATGAGAAATTCTGCCATTTCT  
TAGAGCGTCCTCATGAAACATCAACGCGTAAGGCGATAGCCCAGGGCATGGCTTACGGTTTTGCGAATTCTATATTC  
TACTTCTGTACGCCTCTGCTTTCAGGTTTGGGTTATTTTAATTTTAGAGGAGATCAGCAGTCCAATAAATGTAATGA  
AGGTGTTATTTGCCATATCTTTTACAGCCGGTACGTTAGGGTTCGCGTCAGCGTACTTTCCAGAGTATGCGAAAGCA

AAATTCGCTGCCGCAATAATTTTTAAAATGTTGAAGGAGGAACCTAAGATCGACTCTATGAAAACCTGATGGCGAGAA  
 GCCGGAGATTTCCGGGTCCGTCGATTTTTCCAAGATCTATTTTCGCATATCCCAGCGTCCTGAAGTCGGCGTCCTAA  
 AGGGCCTGGATTTACATGTAGACGCCGGGCAGACCCTGGCAATAGTAGGACCGAGCGGGTGTGGAAAGAGTACTG  
 TCGTCAGCCTACTAGAACGTTTTTACGATCCGATTGACGGTACTGTCCGTGTGCACGGGAACGACATAAGACTTATC  
 AATCCGACATATTTGAGATCACAACCTGGCTCTTGTCTCACAAGAGCCCATCTTGTTGATTGCAGCATCAGGGAAAA  
 TATCATCTACGGCCTTCAGACGGAGGAATTTCCGATGAAGACATCGTGAATGTGGCGAGGTTGGCAAATATCGACA  
 AATTTATTAAGAGCTGCCAGATGGTTATGAGACCAGAGTCGGGGAAAAGGGTACCCAATAAGCGGGGGACAGAA  
 GCAACGTATAGCGATAGCGCGTGC GTTAATTAGGCAACCCAAAATACTATTGCTTGATGAAGCTACAAGTGCTCTAG  
 ATACAGAGTCAGAGAAAGTGGTACAGGAGGCACTAGATAGGGCCGGGAAAGGTAGGACGTGTATAATAATAGCTCA  
 CAGGCTGTCAACAGTAGTGAATGCAAATTGCATTGCCGTGGTGAAGAACGGCATTGTTCTGGAAAAGGGACCCAC  
 GCAGAATAATGGATAAGCGTGGTGCCTATTACTACTAACACAAAACAGAATTTGAAGGAGACTGACGACGATGA  
 CGATGATTTTGACGCAAGAATGTACCCATACGACGTTCCGGACTATGCTTGA

**e) Primers for validation of constructs by sequencing**

| Gene                               | Forward Primers | Sequence (5'-3')         | Reverse Primers | Sequence (5'-3')         |
|------------------------------------|-----------------|--------------------------|-----------------|--------------------------|
| <i>PunPgp-2</i><br>codon optimized | M13-24F-BLUE    | GTAAAACGACGGCCAGTGAGCGCG | M13-24R-BLUE    | AACAGCTATGACCATGATTACGCC |
|                                    | Pgp-2_fw_1      | TGATGCGTTCAAGTCAGGATAATG |                 |                          |
|                                    | Pgp-2_fw_2      | AACATGCTTGGGCTATGTGGAG   |                 |                          |
| Gene                               | Forward Primers | Sequence (5'-3')         | Reverse Primers | Sequence (5'-3')         |
| <i>PunPgp-9</i><br>codon optimized | M13-24F-BLUE    | GTAAAACGACGGCCAGTGAGCGCG | M13-24R-BLUE    | AACAGCTATGACCATGATTACGCC |
|                                    | Pgp-9_fw_1      | ATGTCCATTCGTAGCTCTCATAAG |                 |                          |
|                                    | Pgp-9_fw_2      | AACGAGATTCTGGCGATCTTCG   |                 |                          |

f) Primers for RT-PCR for validation of transgene expression in yeast

| Gene                               | Direction | Sequence (5'-3')                                                                                               | Tm (°C) | Fragment Size (bp) |
|------------------------------------|-----------|----------------------------------------------------------------------------------------------------------------|---------|--------------------|
| <i>PunPgp-2</i><br>Codon optimized | Forward   | GCATAATCAGGGACAT<br>CGTATGG                                                                                    | 63.9    | 962                |
|                                    | Reverse   | GCGGTGATGCAACCCA<br>TCAAC                                                                                      |         |                    |
| <i>PunPgp-9</i><br>Codon optimized | Forward   | TGGCCACGGACACACC<br>AAATGTG or<br>TAGCCCAGGGCATGG<br>CTTACGGTTT (used for<br>RT-PCR in Supplemental<br>Fig. 3) |         | 1441 or<br>1085    |
|                                    | Reverse   | GCATAGTCCGGAACGT<br>CGTATGG                                                                                    |         |                    |
| lacZ                               | Forward   | CTTTTGACACCAGACC<br>AACTGG                                                                                     | 63.1    | 1141               |
|                                    | Reverse   | TGTTCCGTCATAGCGA<br>TAACG                                                                                      |         |                    |

**Supplementary Table S2. Primers and sequences** Sequences of a) full length open P-glycoprotein reading frame amplification (RT-PCR) primers for all *Parascaris univalens* Pgp, b) additional primers used to obtain sequences missing in both transcriptomes, verification primers, RACE PCR and spliced leader PCR) c) sequencing primers for all *Parascaris* Pgp, made by primer walking, d) Codon optimized constructs of *PunPgp-2* and *PunPgp-9* for expression in *Saccharomyces cerevisiae*, e) primers for validating correctness of codon optimized yeast expression constructs e) primers for RT-PCR for validating transgene expression at the transcription level. *Pun*: *Parascaris univalens*; Pgp: P-glycoprotein

**Supplementary Table S3**

| <b>Gene Name in Maximum Likely Hood Tree</b> | <b>Annotated Name (if applicable)</b> | <b>Organism</b>                | <b>Accession Number Genbank</b> | <b>WormBase ID</b> | <b>Contig</b> |
|----------------------------------------------|---------------------------------------|--------------------------------|---------------------------------|--------------------|---------------|
| <b><i>PunPgp-11,1</i></b>                    | <b><i>PeqPgp-11</i></b>               | <i>Parascaris univalens</i>    | AGL08022.1                      |                    |               |
| <b><i>PunPgp-16.1</i></b>                    | <b><i>PeqPgp16</i></b>                | <i>Parascaris univalens</i>    | AGL08023.1                      |                    |               |
| <b><i>PunPgp-2</i></b>                       |                                       | <i>Parascaris univalens</i>    | MT001899                        |                    |               |
| <b><i>PunPgp-3</i></b>                       |                                       | <i>Parascaris univalens</i>    | MT001900                        |                    |               |
| <b><i>PunPgp-9</i></b>                       |                                       | <i>Parascaris univalens</i>    | MT001901                        |                    |               |
| <b><i>PunPgp-10</i></b>                      |                                       | <i>Parascaris univalens</i>    | MT001902                        |                    |               |
| <b><i>PunPgp-11.2</i></b>                    |                                       | <i>Parascaris univalens</i>    | MT001904                        |                    |               |
| <b><i>PunPgp-12</i></b>                      |                                       | <i>Parascaris univalens</i>    | MT001905                        |                    |               |
| <b><i>PunPgp-16.2</i></b>                    |                                       | <i>Parascaris univalens</i>    | MT001907                        |                    |               |
| <b><i>PunPgp-18A</i></b>                     |                                       | <i>Parascaris univalens</i>    | MT001908                        |                    |               |
| <b><i>PunPgp-18B</i></b>                     |                                       | <i>Parascaris univalens</i>    | MT001909                        |                    |               |
| <b><i>CbrPgp-16</i></b>                      | Hypothetical protein CBG12969         | <i>Caenorhabditis briggsae</i> | CAP31851.1                      | BP:CBP17602        |               |
| <b><i>CeIPgp-1</i></b>                       |                                       | <i>Caenorhabditis elegans</i>  | NP_502413                       | WP:CE11932         |               |
| <b><i>CeIPgp-2</i></b>                       |                                       | <i>Caenorhabditis elegans</i>  | NP_491707                       | WP:CE41207         |               |
| <b><i>CeIPgp-3</i></b>                       |                                       | <i>Caenorhabditis elegans</i>  | NP_509901                       | WP:CE03818         |               |
| <b><i>CeIPgp-4</i></b>                       |                                       | <i>Caenorhabditis elegans</i>  | NP_001257143                    | WP:CE03308         |               |
| <b><i>CeIPgp-5</i></b>                       |                                       | <i>Caenorhabditis elegans</i>  | NP_001257116                    | WP:CE43003         |               |
| <b><i>CeIPgp-6</i></b>                       |                                       | <i>Caenorhabditis elegans</i>  | NP_001041287                    | WP:CE40818         |               |

|                       |                                |                               |           |            |                  |
|-----------------------|--------------------------------|-------------------------------|-----------|------------|------------------|
| <b>CeIPgp-7</b>       |                                | <i>Caenorhabditis elegans</i> | NP_509812 | WP:CE36668 |                  |
| <b>CeIPgp-8</b>       |                                | <i>Caenorhabditis elegans</i> | NP_509811 | WP:CE31624 |                  |
| <b>CeIPgp-9</b>       |                                | <i>Caenorhabditis elegans</i> | NP_507487 | WP:CE15714 |                  |
| <b>CeIPgp-10</b>      |                                | <i>Caenorhabditis elegans</i> | NP_509205 | WP:CE40807 |                  |
| <b>CeIPgp-11</b>      |                                | <i>Caenorhabditis elegans</i> | NP_495674 | WP:CE34788 |                  |
| <b>CeIPgp-12</b>      |                                | <i>Caenorhabditis elegans</i> | NP_510126 | WP:CE03260 |                  |
| <b>CeIPgp-13</b>      |                                | <i>Caenorhabditis elegans</i> | NP_510127 | WP:CE40253 |                  |
| <b>CeIPgp-14</b>      |                                | <i>Caenorhabditis elegans</i> | NP_510128 | WP:CE0262  |                  |
| <b>PpaPgp-1</b>       |                                | <i>Pristionchus pacificus</i> |           | PP:PP30697 |                  |
| <b>PpaPgp-9</b>       |                                | <i>Pristionchus pacificus</i> |           | PP:PP38391 |                  |
| <b>AsuPgp-2</b>       | Multidrug resistance protein 1 | <i>Ascaris suum</i>           | ADY40620  |            |                  |
| <b>AsuPgp-11.2</b>    | Multidrug resistance protein 3 | <i>Ascaris suum</i>           | ADY40644  |            |                  |
| <b>AsuPgp-16.2</b>    | Multidrug resistance protein 3 | <i>Ascaris suum</i>           | ADY40573  |            |                  |
| <b>AsuPgp-2_hp</b>    |                                | <i>Ascaris suum</i>           |           |            | AgR011_g279_t03  |
| <b>AsuPgp-3_hp</b>    |                                | <i>Ascaris suum</i>           |           |            | AgR049_g026_t04  |
| <b>AsuPgp-9_hp</b>    |                                | <i>Ascaris suum</i>           |           |            | AgB03_g189_t01   |
| <b>AsuPgp-10_hp</b>   |                                | <i>Ascaris suum</i>           |           |            | AgR054_g025_t01  |
| <b>AsuPgp-11.1_hp</b> |                                | <i>Ascaris suum</i>           |           |            | AgB01_g256_t02   |
| <b>AsuPgp-12_hp</b>   |                                | <i>Ascaris suum</i>           |           |            | AgR009X_g036_t04 |
| <b>AsuPgp-16.1_hp</b> |                                | <i>Ascaris suum</i>           |           |            | AgR016_g207_t01  |
| <b>AsuPgp-18A_hp</b>  |                                | <i>Ascaris suum</i>           |           |            | AgR067_g008_t02  |
| <b>AsuPgp-18B_hp</b>  |                                | <i>Ascaris suum</i>           |           |            | AgR067_g008_t02  |

|                         |                                      |                             |                |             |  |
|-------------------------|--------------------------------------|-----------------------------|----------------|-------------|--|
| <b>HcoPgp-2</b>         |                                      | <i>Haemonchus contortus</i> | AAC38987       |             |  |
| <b>HcoPgp-3</b>         |                                      | <i>Haemonchus contortus</i> | AFX93749.1     |             |  |
| <b>HcoPgp-13</b>        |                                      | <i>Haemonchus contortus</i> | ARE67135.1     |             |  |
| <b>HcoPgp-16</b>        |                                      | <i>Haemonchus contortus</i> | AFX93754.1     |             |  |
| <b>HcoPgp-11.2</b>      |                                      | <i>Haemonchus contortus</i> | CDJ81808.1     |             |  |
| <b>HcoPgp-11.1</b>      |                                      | <i>Haemonchus contortus</i> | CDJ84338.1     |             |  |
| <b>HcoPgp-10</b>        | unnamed protein product              | <i>Haemonchus contortus</i> | CDJ83820.1     |             |  |
| <b>HcoPgp-9.1</b>       |                                      | <i>Haemonchus contortus</i> | JX430397       |             |  |
| <b>ConPgp-2</b>         |                                      | <i>Cooperia oncophora</i>   | AGJ71178       |             |  |
| <b>ConPgp-3</b>         |                                      | <i>Cooperia oncophora</i>   | AGJ71177       |             |  |
| <b>OvoPgp-3 (10280)</b> |                                      | <i>Onchocerca volvulus</i>  |                | OV:OVP11414 |  |
| <b>OvoPgp-10</b>        |                                      | <i>Onchocerca volvulus</i>  |                | OV:OVP13603 |  |
| <b>OvoPgp-11</b>        |                                      | <i>Onchocerca volvulus</i>  |                | OV:OVP14503 |  |
| <b>DimPgp-3</b>         |                                      | <i>Dirofilaria immitis</i>  | ALI16766.1     |             |  |
| <b>DimPgp-11</b>        |                                      | <i>Dirofilaria immitis</i>  | ALI16773.1     |             |  |
| <b>DimPgp-10</b>        |                                      | <i>Dirofilaria immitis</i>  | ALI16764.1     |             |  |
| <b>BmaPGP-10</b>        |                                      | <i>Brugia malayi</i>        |                | BM:BM29899  |  |
| <b>BmaPgp-21</b>        |                                      | <i>Brugia malayi</i>        | XP_001900095   |             |  |
| <b>BmaPgp-10a</b>       |                                      | <i>Brugia malayi</i>        | XP_001897744   |             |  |
| <b>BmaPgp11</b>         |                                      | <i>Brugia malayi</i>        | CRZ23051.1     |             |  |
| <b>BmaPgp-3</b>         | Bm11309                              | <i>Brugia malayi</i>        |                | BM:BM42091  |  |
| <b>BmaPgp-16</b>        | Bm2594, isoform a                    | <i>Brugia malayi</i>        | CDP97625.1     |             |  |
| <b>NamPgp-2</b>         | ABC transporter, ATP-binding protein | <i>Necator americanus</i>   | XP_013305476.1 |             |  |
| <b>NamPgp-13</b>        | ABC transporter, ATP-binding protein | <i>Necator americanus</i>   | XP_013298646.1 |             |  |

|                                        |                                         |                                      |                |  |  |
|----------------------------------------|-----------------------------------------|--------------------------------------|----------------|--|--|
| <b>NamPgp-10</b>                       | ABC transporter,<br>ATP-binding protein | <i>Necator americanus</i>            | XP_013299120.1 |  |  |
| <b>NamPgp-14</b>                       | hypothetical protein<br>NECAME_00050    | <i>Necator americanus</i>            | XP_013309418.1 |  |  |
| <b>CeloPgp-9</b>                       |                                         | <i>Cylicocyclus<br/>elongatus</i>    | AJM87336.1     |  |  |
| <b>TciPgp-13</b>                       |                                         | <i>Teladorsagia<br/>circumcincta</i> | PIO77339.1     |  |  |
| <b>TciPgp-9</b>                        |                                         | <i>Teladorsagia<br/>circumcincta</i> | PIO69295.1     |  |  |
| <b>SmaMRP1_1 (1,2,3)</b>               |                                         | <i>Schistosoma mansonii</i>          | XP_018648325.1 |  |  |
| <b>SmaMRP1_2 (1,2,3)</b>               |                                         | <i>Schistosoma mansonii</i>          | XP_018651783.1 |  |  |
| <b>TcaPgp-2</b>                        | Multidrug resistance<br>protein 1A      | <i>Toxocara canis</i>                | KHN80157.1     |  |  |
| <b>TcaPgp-3a</b>                       |                                         | <i>Toxocara canis</i>                | KHN78383.1     |  |  |
| <b>TcaPgp-12</b>                       | Multidrug resistance<br>protein pgp-3   | <i>Toxocara canis</i>                | KHN87068.1     |  |  |
| <b>TcaPgp-11.1</b>                     | Multidrug resistance<br>protein pgp-1   | <i>Toxocara canis</i>                | KHN73709.1     |  |  |
| <b>TcaPgp-11.2</b>                     | Multidrug resistance<br>protein pgp-3   | <i>Toxocara canis</i>                | KHN89031.1     |  |  |
| <b>TsuPgp-2</b>                        | hypothetical protein<br>M514_09538      | <i>Trichuris suis</i>                | KFD70158.1     |  |  |
| <b><u>Outgroup<br/>(collapsed)</u></b> | -                                       |                                      |                |  |  |
| <b>DmePgpA</b>                         |                                         | <i>Drosophila<br/>melanogaster</i>   | AAA16186       |  |  |
| <b>DmePgpB</b>                         |                                         | <i>Drosophila<br/>melanogaster</i>   | AAA28679       |  |  |
| <b>DmePgpC</b>                         |                                         | <i>Drosophila<br/>melanogaster</i>   | AAA28680       |  |  |
| <b>McaPgp-L</b>                        |                                         | <i>Mytilus californianus</i>         | ABS83556       |  |  |
| <b>MgaPgp-L</b>                        |                                         | <i>Mytilus<br/>galloprovincialis</i> | CAX46411       |  |  |
| <b>MmuABCB-1b</b>                      |                                         | <i>Mus musculus</i>                  | NP_035205      |  |  |
| <b>MmuPgp</b>                          |                                         | <i>Mus musculus</i>                  | AAA39514       |  |  |

|                        |  |                                   |              |  |  |
|------------------------|--|-----------------------------------|--------------|--|--|
| <b><i>PhuMRP-1</i></b> |  | <i>Pediculus humanus corporis</i> | XP_002425149 |  |  |
| <b><i>PhuMRP-2</i></b> |  | <i>Pediculus humanus corporis</i> | XP_002432260 |  |  |
| <b><i>PhuMRP-3</i></b> |  | <i>Pediculus humanus corporis</i> | XP_002426586 |  |  |
| <b><i>PhuMRP-4</i></b> |  | <i>Pediculus humanus corporis</i> | XP_002425021 |  |  |
| <b><i>HsaABCB1</i></b> |  | <i>Homo sapiens</i>               | NP_000918.2  |  |  |

**Supplementary Table 3.** NCBI Accession numbers, WormBase IDs and contigs (*Ascaris suum* transcriptome, GEO: GSE38470) of protein sequences used in the maximum likelihood tree. Annotated gene names were changed according to the result of the phylogenetic analysis in the tree and original gene names are listed.
